# Supplementary material for: Catalyst-free phosphorylation of aryl halides with trialkyl phosphites through electrochemical reduction
Source: Royal Society of Chemistry journal article supplement (doi:10.1039/c9cc07069a), 2019-01-01

## ***Electronic Supplementary Information***

### **Catalyst-Free Phosphorylation of Aryl Halides with Trialkyl Phosphites through Electrochemical Reduction**

Shuai Wang, Cheng Yang, Shuo Sun, Jianbo Wang\*

*Beijing National Laboratory of Molecular Sciences (BNLMS), Key Laboratory of  
Bioorganic Chemistry and Molecular Engineering of Ministry of Education, College  
of Chemistry, Peking University, Beijing 100871, China.*

*Email: [wangjb@pku.edu.cn](mailto:wangjb@pku.edu.cn)*

#### Contents

|                                                        |     |
|--------------------------------------------------------|-----|
| 1) General methods.....                                | S2  |
| 2) Preparation of the electrochemical cell.....        | S2  |
| 3) Experimental procedures.....                        | S4  |
| 4) Cyclic voltammetry (CV) experiments .....           | S6  |
| 5) Spectra data for the products.....                  | S8  |
| 6) References.....                                     | S16 |
| 7) <sup>1</sup> H and <sup>13</sup> C NMR spectra..... | S17 |

## 1) General information

The electrodes were purchased from AIDAHENGSHENG, Tianjin. Potentiostats (ITECH IT6720) were purchased on JD.COM. All necessary reagents were purchased from commercial suppliers and be used without further purification. The solvents were all distilled prior to use. 200-300 mesh silica gels for the chromatography were used.  $^1\text{H}$  and  $^{13}\text{C}$  NMR spectra were recorded at 400 MHz and 100 MHz with Bruker ARX 400 spectrometer.  $^{31}\text{P}$  NMR was recorded at 162 MHz with Bruker ARX 400 spectrometer.  $^{19}\text{F}$  NMR was recorded at 376 MHz with Bruker ARX 400 spectrometer. Chemical shifts for  $^1\text{H}$  NMR (400 MHz) and  $^{13}\text{C}$  NMR (100 MHz) are reported relative to the chemical shift of tetramethylsilane (TMS): chemical shifts ( $\delta$ ) were reported in ppm, and coupling constants ( $J$ ) are in Hertz (Hz). For  $^{31}\text{P}$  NMR (162 MHz) spectra 85% phosphoric acid ( $\delta = 0$ ) was served as external standard. IR spectra are reported in wave numbers,  $\text{cm}^{-1}$ . For HRMS measurements, the mass analyzer is FT-ICR. All of the substrates were purchased from commercial suppliers.

## 2) Preparation of the electrochemical cell

### 2.1 Materials used

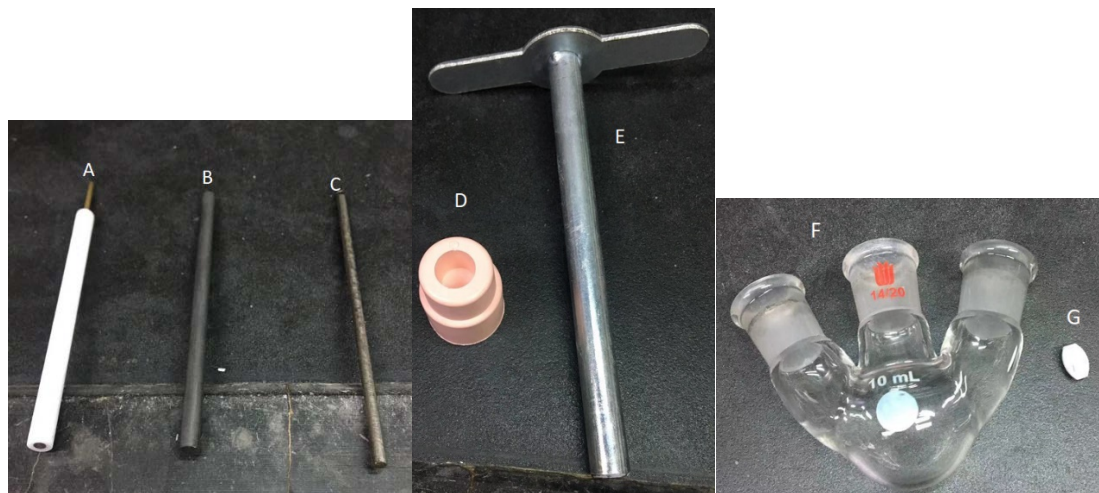

A: Ni plate electrode; B: graphite electrode; C: Ni rob; D: rubber plug (#14); E: hole puncher; F: three-necked round bottom bottle (10 mL); G: stirring bar

### 2.2 Preparation of the electrode

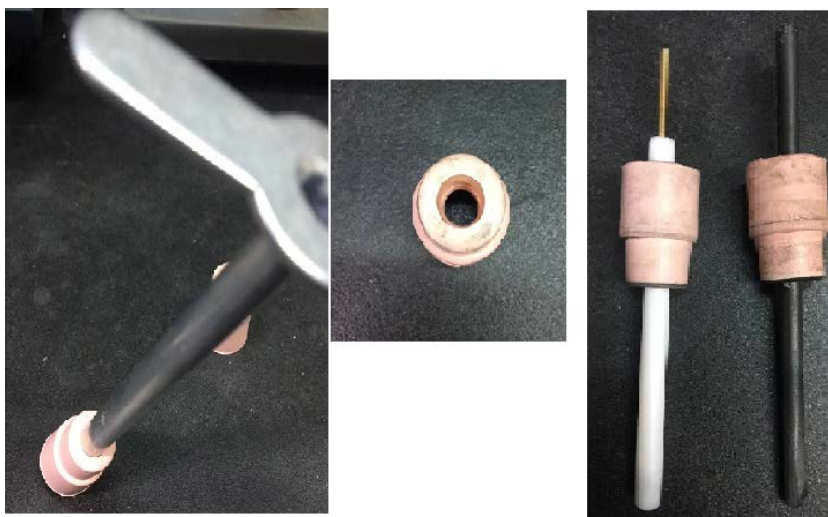

A hole was taken on the rubber plug with the hole puncher, and then the electrode was inserted.

### 2.3 Preparation of the undivided cell

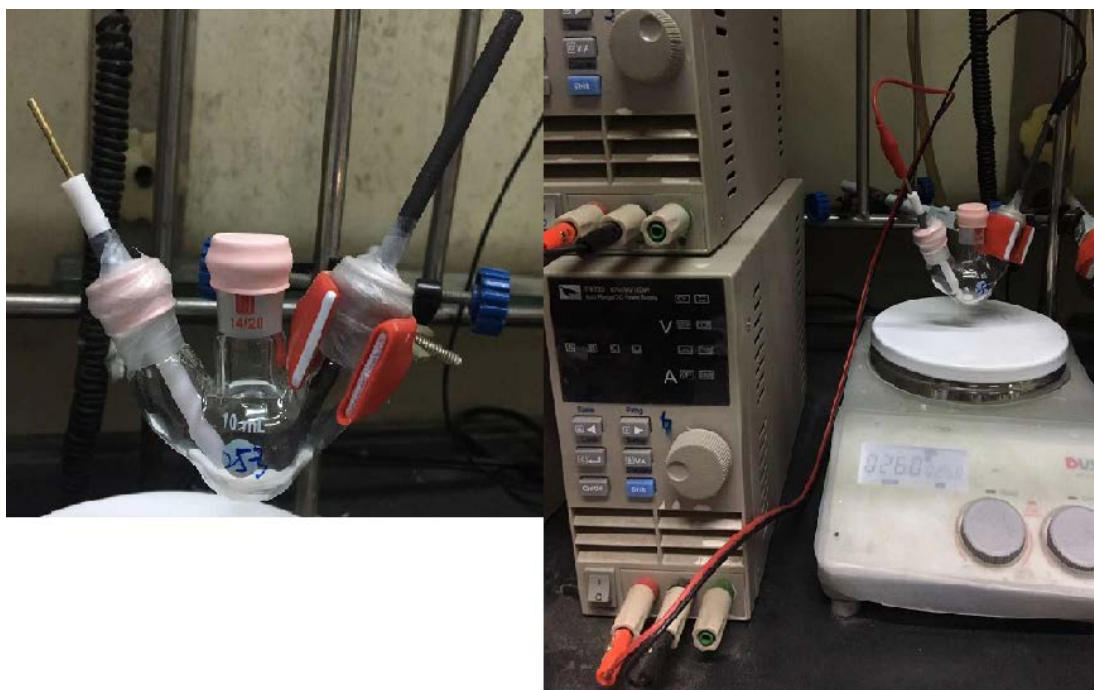

Left to right: 1) the undivided cell, parafilm was used to enhance the sealing property. 2) linkage of the undivided cell to the potentiostat.

### 2.4 Undivided cell for the gram-scale synthesis

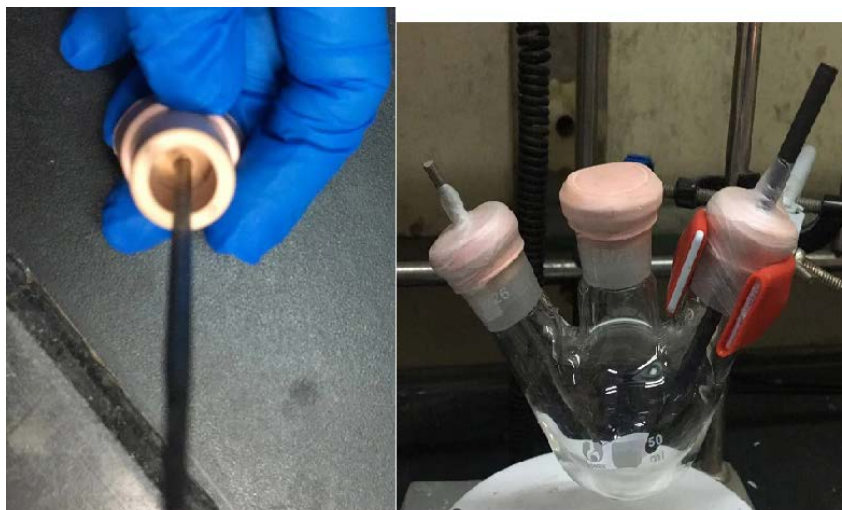

From left to right: 1) the Ni rob was inserted into a #19 rubber plug as the anode. 2) a 100 mL three-necked round bottom bottle was used for the undivided cell.

### 3) Experimental procedure

#### 3.1 General procedure for the phosphorylation of aryl iodides (0.4 mmol scale)

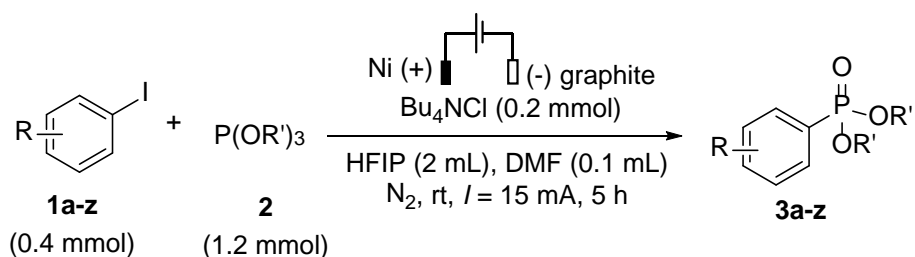

Aryl iodide (0.4 mmol) and TBAC (56 mg, 0.2 mmol) were added into a 10 mL undivided cell (see section 2.3). After the reaction system was degassed for three times, 2 mL HFIP and 0.1 mL DMF were then added. After the addition of trialkyl phosphite (1.2 mmol), the reaction mixture was electrolyzed under a constant current of 15 mA for 5 h under stirring. Solvent was evaporated under reduced pressure, and the residue was purified by preparation thin-layer chromatography (PE:EA = 1:2) to afford crude product (mixed with 0-0.4 equivalent of trialkyl phosphate). The crude product was then purified by reduced-pressure distillation to remove trialkyl phosphate and afford the pure product.

#### 3.2 Procedure for the gram-scale phosphorylation of methyl 4-iodobenzoate (**1a**)

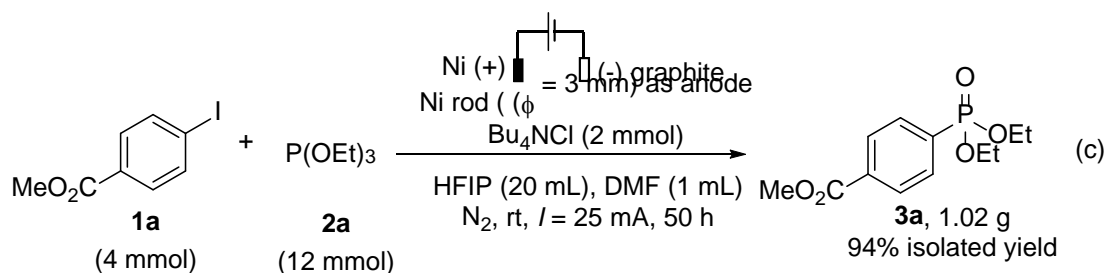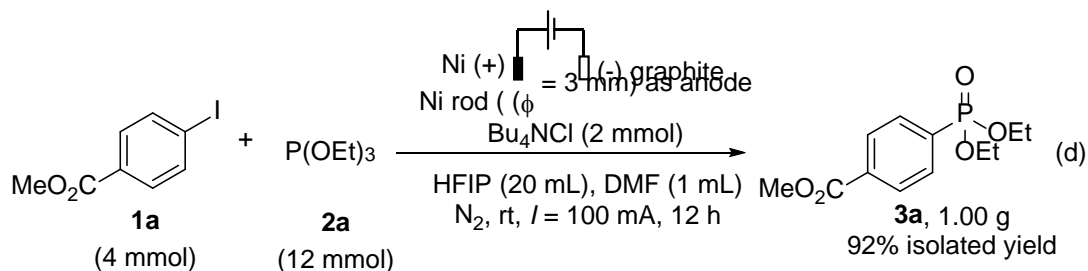

4-Iodobenzoate (**1a**) (1.048 g, 4 mmol) and TBAC (555 mg, 2 mmol) were added into a 100 mL undivided cell (see section 2.4). After the reaction system was degassed for three times, 20 mL HFIP and 1 mL DMF were then added. After the addition of P(OEt)<sub>3</sub> (1.992 g, 12 mmol), the reaction mixture was electrolyzed under a constant current of 25 mA for 50 h (or 100 mA for 12 h) under stirring. Solvent was evaporated under reduced pressure, and the residue was purified by silica gel column chromatography (PE:EA = 2:1) to afford crude product (mixed with triethyl phosphate). The crude product was then purified by reduced-pressure distillation to remove triethyl phosphate and afford the pure product.

### 3.3 Optimization of the reaction conditions for the phosphorylation of aryl bromides

**Table 1. Optimization of the Reaction Conditions<sup>a</sup>**

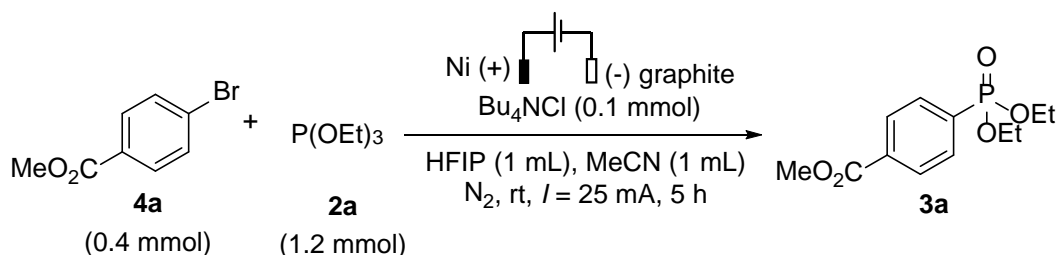

| Entry | Variation from standard conditions      | Yield (%) <sup>b</sup> |
|-------|-----------------------------------------|------------------------|
| 1     | none                                    | 77                     |
| 2     | HFIP (2 mL) and DMF (0.1 mL) as solvent | 45                     |
| 3     | HFIP (2 mL) and DMF (1 mL) as solvent   | 35                     |
| 4     | TBAC (0.05 mmol)                        | 56                     |
| 5     | TBAC (0.3 mmol)                         | 73                     |
| 6     | I = 20 mA, 8 h                          | 71                     |
| 7     | I = 50 mA, 2.5 h                        | 73                     |
| 8     | 60 °C                                   | 72                     |

<sup>a</sup>Standard conditions: Ni plate anode, graphite cathode, **4a** (0.4 mmol), **2a** (1.2 mmol), TBAC (0.1 mmol), HFIP (1 mL), MeCN (1 mL), undivided cell, rt, 25 mA, 5 h.  
<sup>b</sup>Isolated yield.

### 3.4 General procedure for the phosphorylation of aryl bromides (0.4 mmol scale)

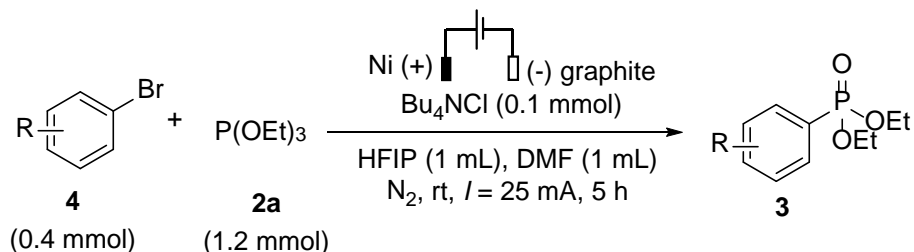

Aryl bromide (0.4 mmol) and TBAC (56 mg, 0.2 mmol) were added into a 10 mL undivided cell (see section 2.3). After the reaction system was degassed for three times, 1 mL HFIP and 1 mL MeCN were then added. After the addition of P(OEt)<sub>3</sub> (199 mg, 1.2 mmol), the reaction mixture was electrolyzed under a constant current of 25 mA for 5 h under stirring. Solvent was evaporated under reduced pressure, and the residue was purified by preparation thin-layer chromatography (PE:EA = 1:2) to afford crude product (mixed with 0-0.5 equivalent of triethyl phosphate). The crude product was then purified by reduced-pressure distillation to remove triethyl phosphate and afford the pure product.

#### 4) Cyclic voltammetry (CV) experiments

Cyclic voltammetry experiments were carried out with a CHI660E work station at room temperature. A mixture solvent of HFIP and DMF (20:1 v/v) was used, with Bu<sub>4</sub>NCl (0.1 M) as electrolyte. The experiments used a graphite electrode as the working electrode, a Ni plate electrode ( $\phi = 0.3$  mm) as the counter electrode and a saturated calomel electrode (SCE) (0.244 V at 25 °C) as the reference electrode. The electric potential was between +0.25 and -3.0 V vs SCE, with 0.1 V/s scan rate. The concentration was 10 mM (for **1a** and NiCl<sub>2</sub>) or 30 mM (for **2a**).

**Figure S1. Cyclic voltammetry curves**

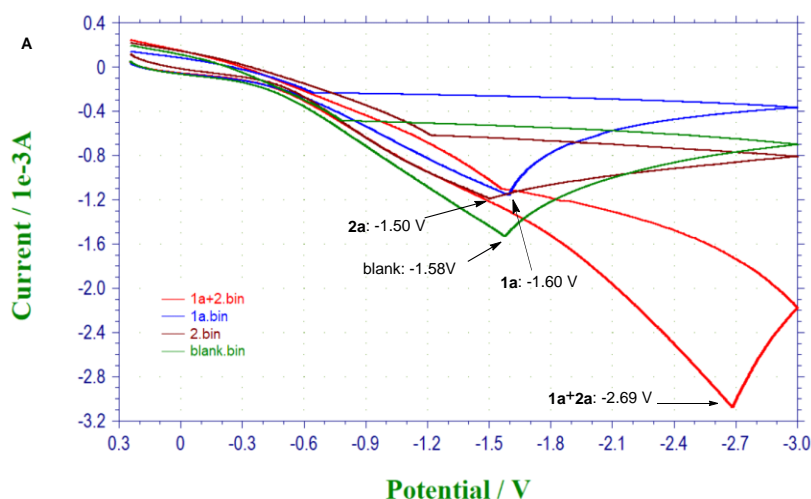

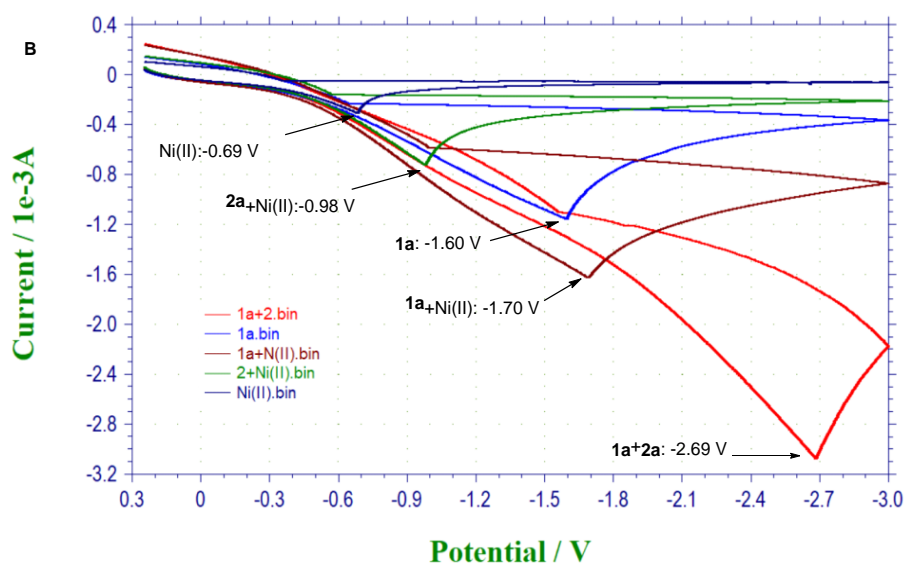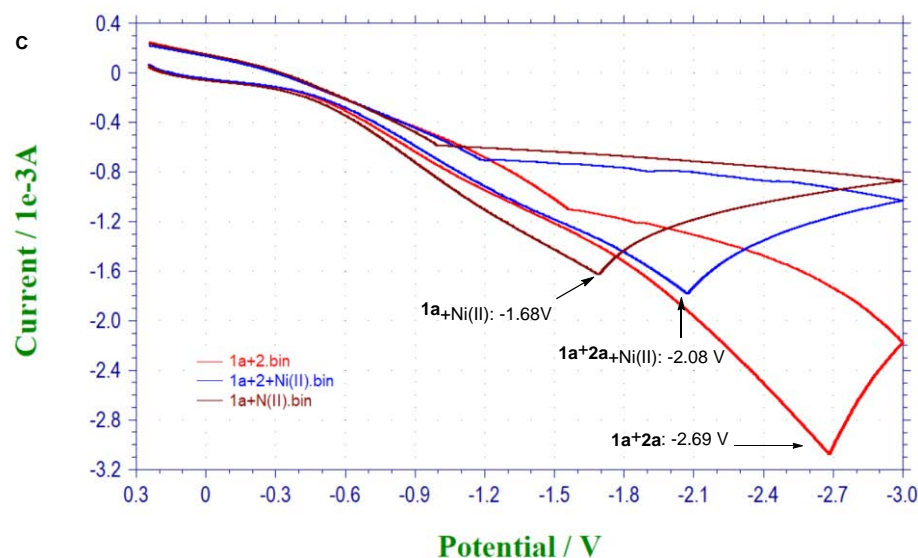

Discussion: As shown in *Figure S1A*, the reduction wave of HFIP was observed in the blank curve (green curve in *Figure S1A*). The separate addition of **1a** and **2a** gave no significant influence, but the combined addition of **1a** and **2a** gave a new reduction wave at -2.69 V and the reduction of HFIP was inhibited under this condition. Results shown in *Figure S1B* reflected the influence of NiCl<sub>2</sub> in several reaction systems. Neither the activation of **1a** or a new reduction wave of Ni(II) was observed in the combination of **1a** and NiCl<sub>2</sub> (brown curve in *Figure S2B*, compared to the curve of **1a**, blue line), which indicated that Ni(II)/Ni(0) cycle was not likely to be involved in the reaction. On the other hand, the reduction of HFIP was obviously inhibited in the presence of Ni(II) (deep blue curve and green curve in *Figure S1B*). As shown in *Figure S1C*, the CV curves of **1a** in the presence of **2a** give only one reduction peak, indicating that after the reduction-generated aryl radical reacts with **2a**, a further reduction process on the cathode was not likely to exist.

## 5) Spectra data for the products

Methyl 4-(diethoxyphosphoryl)benzoate (**3a**)<sup>1</sup>

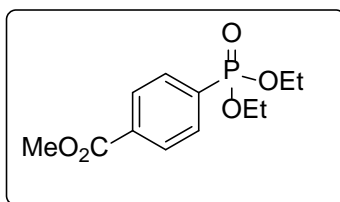

Yield 94% (103.0 mg). Colorless oil. <sup>1</sup>H NMR (400 MHz, CDCl<sub>3</sub>) δ 8.12 (dd, *J* = 8.2, 3.6 Hz, 2H), 7.90 (dd, *J* = 12.9, 8.0 Hz, 2H), 4.23-4.06 (m, 4H), 3.95 (s, 3H), 1.34 (t, *J* = 7.1 Hz, 6H); <sup>13</sup>C NMR (100 MHz, CDCl<sub>3</sub>) δ 166.2, 133.5 (d, *J* = 3.1 Hz), 133.2 (d, *J* = 186.6 Hz), 131.7 (d, *J* = 10.1 Hz), 129.4 (d, *J* = 15.1 Hz), 62.4 (d, *J* = 5.6 Hz), 52.4, 16.3 (d, *J* = 6.4 Hz); <sup>31</sup>P NMR (CDCl<sub>3</sub>, 162 MHz) δ 17.58; IR (film): 2982, 1731, 1278, 1106, 1020, 967 cm<sup>-1</sup>.

Methyl 4-(dipropoxyphosphoryl)benzoate (**3ac**)

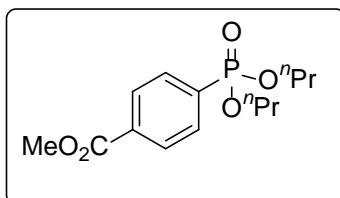

Yield 99% (119 mg). Colorless oil. <sup>1</sup>H NMR (400 MHz, CDCl<sub>3</sub>) δ 8.13 (dd, *J* = 8.1, 3.8 Hz, 2H), 7.90 (dd, *J* = 12.9, 8.0 Hz, 2H), 4.10-3.97 (m, 4H), 3.95 (s, 3H), 1.75-1.66 (m, 4H), 0.94 (t, *J* = 7.4 Hz, 6H); <sup>13</sup>C NMR (100 MHz, CDCl<sub>3</sub>) δ 166.2, 133.4 (d, *J* = 3.1 Hz), 133.2 (d, *J* = 187.0), 131.7 (d, *J* = 10.0 Hz), 129.3 (d, *J* = 15.0 Hz), 67.8 (d, *J* = 5.8 Hz), 52.4, 23.7 (d, *J* = 6.4 Hz), 10.0; <sup>31</sup>P NMR (CDCl<sub>3</sub>, 162 MHz) δ 17.36; IR (film): 2969, 1730, 1279, 1106, 999, 730 cm<sup>-1</sup>. HRMS (ESI) calcd for C<sub>14</sub>H<sub>22</sub>O<sub>5</sub>P [M+H]<sup>+</sup> 301.1199 (301.119937), found 301.1199 (301.119888).

Methyl 4-(diisopropoxyphosphoryl)benzoate (**3ad**)<sup>10</sup>

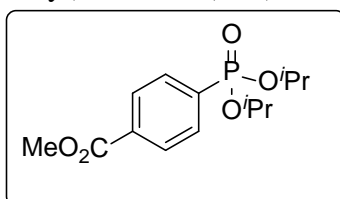

Yield 99% (119 mg). Colorless oil. <sup>1</sup>H NMR (400 MHz, CDCl<sub>3</sub>) δ 8.13-8.10 (m, 2H), 7.90 (dd, *J* = 12.9, 8.2 Hz, 2H), 4.76-4.68 (m, 2H), 3.95 (s, 3H), 1.38 (d, *J* = 6.2 Hz, 6H), 1.23 (d, *J* = 6.2 Hz, 6H); <sup>13</sup>C NMR (100 MHz, CDCl<sub>3</sub>) δ 166.3, 134.8 (d, *J* = 187.1 Hz), 133.1 (d, *J* = 3.1 Hz), 131.7 (d, *J* = 10.1 Hz), 129.2 (d, *J* = 14.9 Hz), 71.1 (d, *J* = 5.7 Hz), 52.4, 24.0 (d, *J* = 3.9 Hz), 23.8 (d, *J* = 4.7 Hz); <sup>31</sup>P NMR (CDCl<sub>3</sub>, 162 MHz) δ 15.14; IR (film): 2982, 1730, 1278, 1252, 1102, 980 cm<sup>-1</sup>.

Methyl 4-(dibutoxyphosphoryl)benzoate (**3ae**)



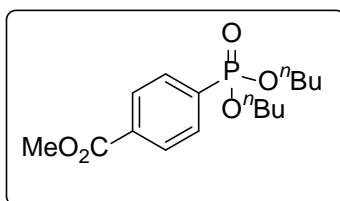

Yield 75% (98 mg). Colorless oil.  $^1\text{H NMR}$  (400 MHz,  $\text{CDCl}_3$ )  $\delta$  8.12 (dd,  $J = 8.1, 3.8$  Hz, 2H), 7.88 (dd,  $J = 12.9, 8.1$  Hz, 2H), 4.12-4.00 (m, 4H), 3.95 (s, 3H), 1.69-1.62 (m, 4H), 1.42-1.36 (m, 4H), 0.91 (t,  $J = 7.4$  Hz, 6H);  $^{13}\text{C NMR}$  (100 MHz,  $\text{CDCl}_3$ )  $\delta$  166.2, 133.4 (d,  $J = 3.4$  Hz), 133.2 (d,  $J = 186.5$  Hz), 131.7 (d,  $J = 9.9$  Hz), 129.4 (d,  $J = 14.9$  Hz), 66.0 (d,  $J = 5.8$  Hz), 52.4, 32.4 (d,  $J = 6.3$  Hz), 18.7, 13.5;  $^{31}\text{P NMR}$  ( $\text{CDCl}_3$ , 162 MHz)  $\delta$  17.40; IR (film): 2959, 1731, 1278, 1105, 1019, 978  $\text{cm}^{-1}$ . HRMS (ESI) calcd for  $\text{C}_{16}\text{H}_{16}\text{O}_5\text{P}$   $[\text{M}+\text{H}]^+$  329.1512 (329.151237), found 329.1512 (329.151201).

Diethyl (4-acetylphenyl)phosphonate (**3b**)<sup>1</sup>

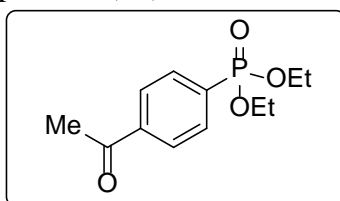

Yield 72% (74.0 mg). Colorless oil.  $^1\text{H NMR}$  (400 MHz,  $\text{CDCl}_3$ )  $\delta$  8.05-8.02 (m, 2H), 7.92 (ddd,  $J = 12.7, 8.1, 1.3$  Hz, 2H), 4.23-4.06 (m, 4H), 2.64 (d,  $J = 1.8$  Hz, 3H), 1.34 (td,  $J = 7.0, 1.4$  Hz, 6H);  $^{13}\text{C NMR}$  (100 MHz,  $\text{CDCl}_3$ )  $\delta$  197.4, 139.7 (d,  $J = 3.0$  Hz), 133.3 (d,  $J = 186.5$  Hz), 132.0 (d,  $J = 10.1$  Hz), 128.0 (d,  $J = 15.0$  Hz), 62.3 (d,  $J = 5.4$  Hz), 26.7, 16.3 (d,  $J = 6.4$  Hz);  $^{31}\text{P NMR}$  ( $\text{CDCl}_3$ , 162 MHz)  $\delta$  17.41; IR (film): 2984, 1691, 1396, 1253, 1018, 962  $\text{cm}^{-1}$ .

Diethyl (4-(trifluoromethyl)phenyl)phosphonate (**3c**)<sup>2</sup>

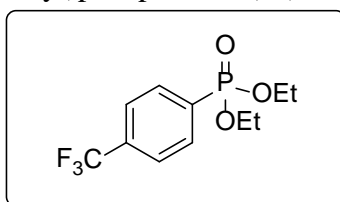

Yield 99% (112.6 mg). Colorless oil.  $^1\text{H NMR}$  (400 MHz,  $\text{CDCl}_3$ )  $\delta$  7.96 (dd,  $J = 12.9, 8.1$  Hz, 2H), 7.74 (dd,  $J = 7.8, 2.9$  Hz, 2H), 4.24-4.07 (m, 4H), 1.35 (t,  $J = 7.1$  Hz, 6H);  $^{13}\text{C NMR}$  (100 MHz,  $\text{CDCl}_3$ )  $\delta$  134.0 (qd,  $J = 32.7, 3.2$  Hz), 132.7 (d,  $J = 187.8$  Hz), 132.1 (d,  $J = 10.0$  Hz), 125.2 (dq,  $J = 15.1, 3.7$  Hz), 123.5 (q,  $J = 272.7$  Hz), 62.4 (d,  $J = 5.5$  Hz), 16.2 (d,  $J = 6.4$  Hz);  $^{19}\text{F NMR}$  ( $\text{CDCl}_3$ , 377 MHz)  $\delta$  -63.4;  $^{31}\text{P NMR}$  ( $\text{CDCl}_3$ , 162 MHz)  $\delta$  16.79; IR (film): 2992, 1400, 1324, 1133, 1019, 970  $\text{cm}^{-1}$ .

Diethyl *p*-tolylphosphonate (**3d**)<sup>1</sup>

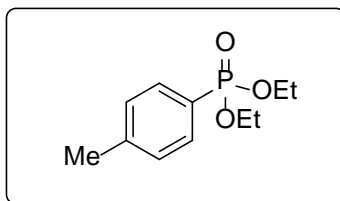

Yield 66% (60.1 mg). Colorless oil.  $^1\text{H NMR}$  (400 MHz,  $\text{CDCl}_3$ )  $\delta$  7.70 (dd,  $J = 13.1$ , 8.0 Hz, 2H), 7.29 (dd,  $J = 7.9$ , 4.0 Hz, 2H), 4.18-4.01 (m, 4H), 2.40 (s, 3H), 1.32 (t,  $J = 7.0$  Hz, 6H);  $^{13}\text{C NMR}$  (100 MHz,  $\text{CDCl}_3$ )  $\delta$  142.8 (d,  $J = 3.1$  Hz), 131.7 (d,  $J = 10.3$  Hz), 129.1 (d,  $J = 15.4$  Hz), 124.9 (d,  $J = 190.0$  Hz), 61.8 (d,  $J = 5.3$  Hz), 21.5, 16.2 (d,  $J = 6.5$  Hz);  $^{31}\text{P NMR}$  ( $\text{CDCl}_3$ , 162 MHz)  $\delta$  20.08; IR (film): 2980, 1606, 1250, 1130, 1024, 964  $\text{cm}^{-1}$ .

Diethyl (4-methoxyphenyl)phosphonate (**3e**)<sup>1</sup>

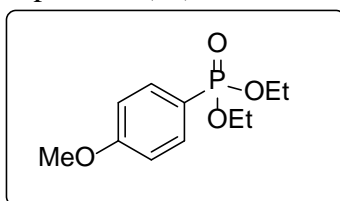

Yield 54% (52.8 mg). Colorless oil.  $^1\text{H NMR}$  (400 MHz,  $\text{CDCl}_3$ )  $\delta$  7.78-7.72 (m, 2H), 6.97 (dd,  $J = 12.2$ , 8.8 Hz, 2H), 4.15-4.02 (m, 4H), 3.85 (s, 3H), 1.31 (t,  $J = 7.1$  Hz, 6H);  $^{13}\text{C NMR}$  (100 MHz,  $\text{CDCl}_3$ )  $\delta$  162.8 (d,  $J = 3.5$  Hz), 133.7 (d,  $J = 11.2$  Hz), 119.4 (d,  $J = 195.0$  Hz), 113.9 (d,  $J = 16.0$  Hz), 61.8 (d,  $J = 5.2$  Hz), 55.3, 16.3 (d,  $J = 6.5$  Hz);  $^{31}\text{P NMR}$  ( $\text{CDCl}_3$ , 162 MHz)  $\delta$  20.26; IR (film): 2982, 1601, 1241, 1133, 1026, 964, 730  $\text{cm}^{-1}$ .

Diethyl (4-(trifluoromethoxy)phenyl)phosphonate (**3f**)<sup>3</sup>

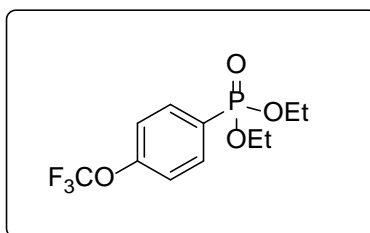

Yield 99% (118.7 mg). Colorless oil.  $^1\text{H NMR}$  (400 MHz,  $\text{CDCl}_3$ )  $\delta$  7.87 (dd,  $J = 12.9$ , 8.7 Hz, 2H), 7.32-7.29 (m, 2H), 4.20-4.07 (m, 4H), 1.34 (t,  $J = 7.1$  Hz, 6H);  $^{13}\text{C NMR}$  (100 MHz,  $\text{CDCl}_3$ )  $\delta$  152.2, 133.8 (d,  $J = 10.9$  Hz), 127.1 (d,  $J = 191.5$  Hz), 120.4 (d,  $J = 16.2$  Hz), 120.2 (q,  $J = 258.8$  Hz), 62.3 (d,  $J = 5.6$  Hz), 16.3 (d,  $J = 6.5$  Hz);  $^{19}\text{F NMR}$  ( $\text{CDCl}_3$ , 377 MHz)  $\delta$  -57.7;  $^{31}\text{P NMR}$  ( $\text{CDCl}_3$ , 162 MHz)  $\delta$  17.52; IR (film): 2987, 1598, 1487, 1253, 1023, 965  $\text{cm}^{-1}$ .

Diethyl [1,1'-biphenyl]-4-ylphosphonate (**3g**)

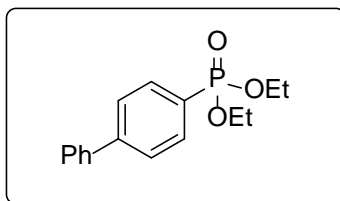

Yield 65% (75.6 mg). Colorless oil. Purified by preparation thin-layer chromatography (PE:EA:DCM = 1:1:0.15) to afford crude product.  $^1\text{H}$  NMR (400 MHz,  $\text{CDCl}_3$ )  $\delta$  7.89 (dd,  $J = 13.0, 8.2$  Hz, 2H), 7.68 (dd,  $J = 8.1, 3.8$  Hz, 2H), 7.60 (d,  $J = 7.2$  Hz, 2H), 7.46 (t,  $J = 7.1$  Hz, 2H), 7.39 (t,  $J = 7.1$  Hz, 1H), 4.23-4.06 (m, 4H), 1.35 (t,  $J = 7.1$  Hz, 6H);  $^{13}\text{C}$  NMR (100 MHz,  $\text{CDCl}_3$ )  $\delta$  145.1 (d,  $J = 3.4$  Hz), 139.8, 132.2 (d,  $J = 10.2$  Hz), 128.8, 127.7, 127.2, 127.0, 126.8 (d,  $J = 189.7$  Hz), 62.0 (d,  $J = 5.4$  Hz), 16.3 (d,  $J = 6.5$  Hz);  $^{31}\text{P}$  NMR ( $\text{CDCl}_3$ , 162 MHz)  $\delta$  19.54; IR (film): 2978, 1601, 1392, 1250, 1134, 1023, 964  $\text{cm}^{-1}$ .

Diethyl (4-chlorophenyl)phosphonate (**3h**)<sup>4</sup>

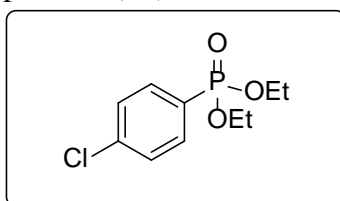

Yield 43% (43.0 mg). Colorless oil. Purified by preparation thin-layer chromatography (PE:EA:DCM = 1:1:0.05) to afford crude product.  $^1\text{H}$  NMR (400 MHz,  $\text{CDCl}_3$ )  $\delta$  7.75 (dd,  $J = 12.9, 8.3$  Hz, 2H), 7.45 (dd,  $J = 8.3, 3.4$  Hz, 2H), 4.18-4.05 (m, 4H), 1.33 (t,  $J = 7.1$  Hz, 6H);  $^{13}\text{C}$  NMR (100 MHz,  $\text{CDCl}_3$ )  $\delta$  138.9 (d,  $J = 3.9$  Hz), 133.1 (d,  $J = 10.7$  Hz), 128.8 (d,  $J = 15.5$  Hz), 126.9 (d,  $J = 190.8$  Hz), 62.2 (d,  $J = 5.5$  Hz), 16.3 (d,  $J = 6.5$  Hz);  $^{31}\text{P}$  NMR ( $\text{CDCl}_3$ , 162 MHz)  $\delta$  18.19; IR (film): 2983, 1586, 1392, 1249, 1132, 1024, 969  $\text{cm}^{-1}$ .

Diethyl (4-bromophenyl)phosphonate (**3i**)<sup>5</sup>

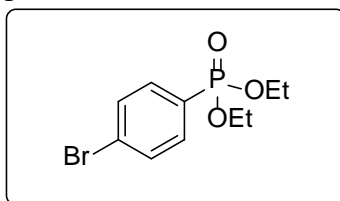

Yield 51% (59.9 mg). Colorless oil. Purified by preparation thin-layer chromatography (PE:EA:DCM = 1:1:0.05) to afford crude product.  $^1\text{H}$  NMR (400 MHz,  $\text{CDCl}_3$ )  $\delta$  7.71-7.65 (m, 2H), 7.63-7.60 (m, 2H), 4.20-4.03 (m, 4H), 1.32 (t,  $J = 7.1$  Hz, 6H);  $^{13}\text{C}$  NMR (100 MHz,  $\text{CDCl}_3$ )  $\delta$  133.2 (d,  $J = 10.5$  Hz), 131.7 (d,  $J = 15.5$  Hz), 127.5 (d,  $J = 4.1$  Hz), 127.4 (d,  $J = 190.2$  Hz), 62.2 (d,  $J = 5.4$  Hz), 16.3 (d,  $J = 6.3$  Hz);  $^{31}\text{P}$  NMR ( $\text{CDCl}_3$ , 162 MHz)  $\delta$  18.31; IR (film): 2982, 1581, 1388, 1250, 1023, 966  $\text{cm}^{-1}$ .

Diethyl phenylphosphonate (**3j**)<sup>1</sup>

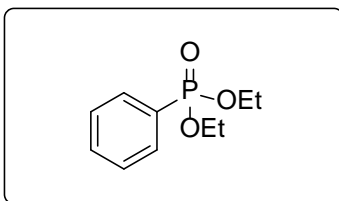

Yield 56% (48.5 mg). Colorless oil.  $^1\text{H}$  NMR (400 MHz,  $\text{CDCl}_3$ )  $\delta$  7.84-7.79 (m, 2H), 7.56 (td,  $J = 7.4, 1.2$  Hz, 1H), 7.49 – 7.44 (m, 4H), 4.20-4.03 (m, 4H), 1.33 (t,  $J = 7.1$  Hz, 6H);  $^{13}\text{C}$  NMR (100 MHz,  $\text{CDCl}_3$ )  $\delta$  132.3 (d,  $J = 3.1$  Hz), 131.7 (d,  $J = 10.0$  Hz), 128.4 (d,  $J = 15.1$  Hz), 128.3 (d,  $J = 187.7$  Hz), 62.0 (d,  $J = 5.3$  Hz), 16.3 (d,  $J = 6.5$  Hz);  $^{31}\text{P}$  NMR ( $\text{CDCl}_3$ , 162 MHz)  $\delta$  19.36; IR (film): 2986, 1245, 1132, 1026, 967, 731  $\text{cm}^{-1}$ .

Diethyl (4-acetamidophenyl)phosphonate (**3k**)<sup>6</sup>

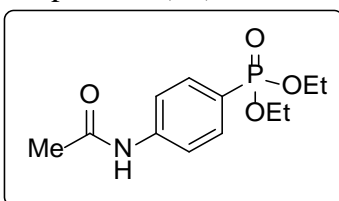

Yield 82% (89.0 mg). White solid, m.p. 137-139 °C. Purified by silica gel column chromatography (EA) to afford pure product.  $^1\text{H}$  NMR (400 MHz,  $\text{CDCl}_3$ )  $\delta$  9.32 (s, 1H), 7.74-7.70 (m, 4H), 4.11-4.05 (m, 4H), 2.20 (s, 3H), 1.31 (t,  $J = 6.9$  Hz, 6H);  $^{13}\text{C}$  NMR (100 MHz,  $\text{CDCl}_3$ )  $\delta$  188.5, 142.7, 132.6 (d,  $J = 10.7$  Hz), 121.8 (d,  $J = 192.7$  Hz), 119.2 (d,  $J = 15.2$  Hz), 62.2 (d,  $J = 5.4$  Hz), 24.4, 16.2 (d,  $J = 6.5$  Hz);  $^{31}\text{P}$  NMR ( $\text{CDCl}_3$ , 162 MHz)  $\delta$  19.37; IR (film): 1072, 1595, 1531, 1227, 1024, 963  $\text{cm}^{-1}$ .

Diethyl (4-cyanophenyl)phosphonate (**3l**)<sup>1</sup>

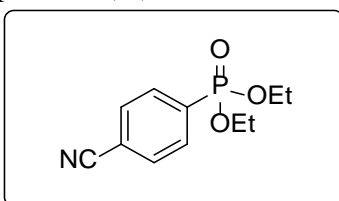

Yield 65% (62.2 mg). Colorless oil.  $^1\text{H}$  NMR (400 MHz,  $\text{CDCl}_3$ )  $\delta$  7.93 (dd,  $J = 13.1, 7.9$  Hz, 2H), 7.77 (dd,  $J = 7.9, 3.3$  Hz, 2H), 4.22-4.09 (m, 4H), 1.34 (t,  $J = 7.1$  Hz, 6H);  $^{13}\text{C}$  NMR (100 MHz,  $\text{CDCl}_3$ )  $\delta$  133.8 (d,  $J = 187.8$ ), 132.2 (d,  $J = 10.0$  Hz), 131.9 (d,  $J = 14.9$  Hz), 117.8, 115.9 (d,  $J = 3.4$  Hz), 62.6 (d,  $J = 5.7$  Hz), 16.2 (d,  $J = 6.4$  Hz);  $^{31}\text{P}$  NMR ( $\text{CDCl}_3$ , 162 MHz)  $\delta$  15.81; IR (film): 2984, 2233, 1394, 1254, 1019, 971, 803  $\text{cm}^{-1}$ .

Methyl 3-(diethoxyphosphoryl)benzoate (**3m**)<sup>7</sup>

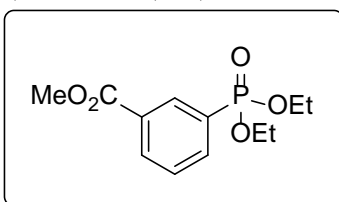

Yield 90% (97.9 mg). Colorless oil.  $^1\text{H}$  NMR (400 MHz,  $\text{CDCl}_3$ )  $\delta$  8.48 (d,  $J = 13.8$  Hz, 1H), 8.23 (dd,  $J = 7.8, 1.3$  Hz, 1H), 8.02 (dd,  $J = 12.9, 7.6$  Hz, 1H), 7.58 (td,  $J = 7.7, 4.0$  Hz, 1H), 4.23-4.06 (m, 4H), 3.95 (s, 3H), 1.34 (t,  $J = 7.1$  Hz, 6H);  $^{13}\text{C}$  NMR (100 MHz,  $\text{CDCl}_3$ )  $\delta$  166.0, 135.9 (d,  $J = 10.0$  Hz), 133.2 (d,  $J = 2.9$  Hz), 132.7 (d,  $J = 10.9$  Hz), 130.4 (d,  $J = 14.9$  Hz), 129.2 (d,  $J = 189.7$  Hz), 128.6 (d,  $J = 15.1$  Hz), 62.3 (d,  $J = 5.4$  Hz), 52.3, 16.2 (d,  $J = 6.4$  Hz);  $^{31}\text{P}$  NMR ( $\text{CDCl}_3$ , 162 MHz)  $\delta$  17.73; IR (film): 2992, 1728, 1439, 1252, 1140, 1021, 966  $\text{cm}^{-1}$ .

Diethyl m-tolylphosphonate (**3n**)<sup>1</sup>

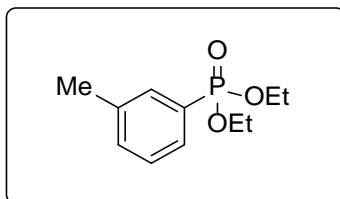

Yield 76% (69.5 mg). Colorless oil.  $^1\text{H}$  NMR (400 MHz,  $\text{CDCl}_3$ )  $\delta$  7.66-7.58 (m, 2H), 7.37-7.35 (m, 2H), 4.18-4.04 (m, 4H), 2.40 (s, 3H), 1.33 (t,  $J = 7.1$  Hz, 6H);  $^{13}\text{C}$  NMR (100 MHz,  $\text{CDCl}_3$ )  $\delta$  138.2 (d,  $J = 14.9$  Hz), 133.1 (d,  $J = 3.1$  Hz), 132.2 (d,  $J = 9.9$  Hz), 128.7 (d,  $J = 9.8$  Hz), 128.3 (d,  $J = 15.6$  Hz), 128.0 (d,  $J = 186.8$  Hz), 62.0 (d,  $J = 5.5$  Hz), 21.3, 16.3 (d,  $J = 6.4$  Hz);  $^{31}\text{P}$  NMR ( $\text{CDCl}_3$ , 162 MHz)  $\delta$  19.80; IR (film): 2962, 1444, 1392, 1249, 1023, 964, 785, 696  $\text{cm}^{-1}$ .

Diethyl (3-methoxyphenyl)phosphonate (**3o**)<sup>8</sup>

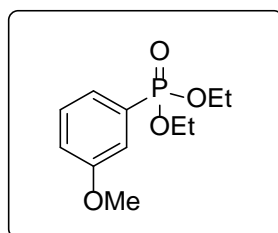

Yield 69% (67.6 mg). Colorless oil.  $^1\text{H}$  NMR (400 MHz,  $\text{CDCl}_3$ )  $\delta$  7.40-7.32 (m, 3H), 7.10-7.07 (m, 1H), 4.18-4.10 (m, 4H), 3.85 (s, 3H), 1.33 (t,  $J = 7.1$  Hz, 6H);  $^{13}\text{C}$  NMR (100 MHz,  $\text{CDCl}_3$ )  $\delta$  159.4 (d,  $J = 18.7$  Hz), 129.7 (d,  $J = 17.6$  Hz), 129.5 (d,  $J = 186.6$  Hz), 123.9 (d,  $J = 9.3$  Hz), 118.7 (d,  $J = 3.3$  Hz), 116.3 (d,  $J = 11.2$  Hz), 62.1 (d,  $J = 5.4$  Hz), 55.4, 16.3 (d,  $J = 6.5$  Hz);  $^{31}\text{P}$  NMR ( $\text{CDCl}_3$ , 162 MHz)  $\delta$  19.15; IR (film): 2987, 1598, 1487, 1253, 1023, 965  $\text{cm}^{-1}$ .

Diethyl o-tolylphosphonate (**3p**)<sup>1</sup>

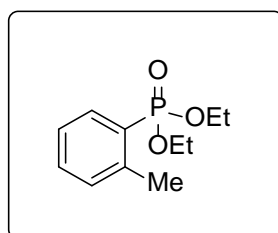

Yield 91% (82.7 mg). Colorless oil.  $^1\text{H}$  NMR (400 MHz,  $\text{CDCl}_3$ )  $\delta$  7.94-7.88 (m, 1H), 7.42-7.41 (m, 1H), 7.28-7.24 (m, 2H), 4.19-4.05 (m, 4H), 2.58 (s, 3H), 1.33 (t,  $J = 7.1$

Hz, 6H);  $^{13}\text{C}$  NMR (100 MHz,  $\text{CDCl}_3$ )  $\delta$  141.7 (d,  $J = 10.2$  Hz), 133.8 (d,  $J = 10.3$  Hz), 132.4 (d,  $J = 2.9$  Hz), 131.1 (d,  $J = 14.8$  Hz), 126.7 (d,  $J = 184.0$  Hz), 125.3 (d,  $J = 15.1$  Hz), 61.8 (d,  $J = 5.4$  Hz), 21.1 (d,  $J = 3.6$  Hz), 16.2 (d,  $J = 6.4$  Hz);  $^{31}\text{P}$  NMR ( $\text{CDCl}_3$ , 162 MHz)  $\delta$  19.95; IR (film): 2981, 1597, 1453, 1392, 1245, 1022, 963, 754  $\text{cm}^{-1}$ .

#### Diethyl naphthalen-1-ylphosphonate (**3q**)<sup>1</sup>

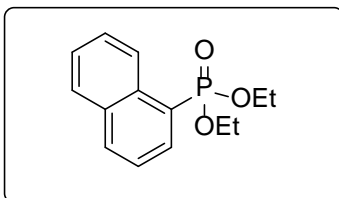

Yield 74% (78.4 mg). Colorless oil.  $^1\text{H}$  NMR (400 MHz,  $\text{CDCl}_3$ )  $\delta$  8.52 (d,  $J = 8.5$  Hz, 1H), 8.25 (ddd,  $J = 16.3, 7.0, 1.0$  Hz, 1H), 8.04 (d,  $J = 8.2$  Hz, 1H), 7.90 (d,  $J = 8.0$  Hz, 1H), 7.63-7.59 (m, 1H), 7.57-7.51 (m, 2H), 4.26-4.16 (m, 2H), 4.13-4.03 (m, 2H), 1.31 (t,  $J = 7.1$  Hz, 6H);  $^{13}\text{C}$  NMR (100 MHz,  $\text{CDCl}_3$ )  $\delta$  134.6 (d,  $J = 9.3$  Hz), 133.6 (d,  $J = 3.1$  Hz), 133.5, 132.6 (d,  $J = 10.8$  Hz), 128.7 (d,  $J = 1.5$  Hz), 127.4, 126.6 (d,  $J = 4.2$  Hz), 126.3, 124.5 (d,  $J = 182.5$  Hz), 124.5 (d,  $J = 16.7$  Hz), 62.1 (d,  $J = 5.2$  Hz), 16.3 (d,  $J = 6.5$  Hz);  $^{31}\text{P}$  NMR ( $\text{CDCl}_3$ , 162 MHz)  $\delta$  19.77; IR (film): 2989, 1508, 1243, 1050, 1021, 967  $\text{cm}^{-1}$ .

#### Diethyl naphthalen-2-ylphosphonate (**3r**)<sup>1</sup>

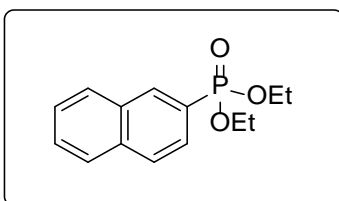

Yield 77% (82.1 mg). Colorless oil.  $^1\text{H}$  NMR (400 MHz,  $\text{CDCl}_3$ )  $\delta$  8.44 (d,  $J = 15.5$  Hz, 1H), 7.95-7.87 (m, 3H), 7.80-7.74 (m, 1H), 7.62-7.54 (m, 2H), 4.23-4.08 (m, 4H), 1.34 (t,  $J = 7.1$  Hz, 6H);  $^{13}\text{C}$  NMR (100 MHz,  $\text{CDCl}_3$ )  $\delta$  134.9, 134.0 (d,  $J = 10.2$  Hz), 132.3 (d,  $J = 16.6$  Hz), 128.8, 128.3 (d,  $J = 14.1$  Hz), 128.2, 127.7, 126.8, 126.3 (d,  $J = 9.9$  Hz), 125.3 (d,  $J = 187.9$  Hz), 62.1 (d,  $J = 5.3$  Hz), 16.3 (d,  $J = 6.5$  Hz);  $^{31}\text{P}$  NMR ( $\text{CDCl}_3$ , 162 MHz)  $\delta$  19.57; IR (film): 2984, 1593, 1392, 1252, 1022, 965, 748, 651  $\text{cm}^{-1}$ .

#### Diethyl (2-fluoro-4-methylphenyl)phosphonate (**3s**)

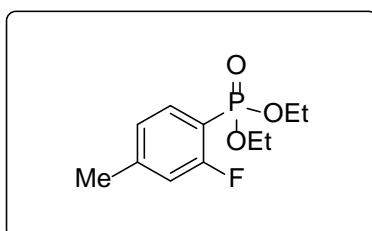

Yield 63% (61.6 mg). Colorless oil.  $^1\text{H}$  NMR (400 MHz,  $\text{CDCl}_3$ )  $\delta$  7.77-7.70 (m, 1H), 7.06-7.04 (m, 1H), 6.94 (dd,  $J = 10.3, 5.9$  Hz, 1H), 4.22-4.09 (m, 4H), 2.40 (s, 3H),

1.34 (t,  $J = 7.1$  Hz, 6H);  $^{13}\text{C}$  NMR (100 MHz,  $\text{CDCl}_3$ )  $\delta$  164.6, 162.1, 146.3 (dd,  $J = 8.4, 2.4$  Hz), 134.7 (dd,  $J = 6.5, 4.4$  Hz), 124.9 (dd,  $J = 14.0, 2.9$  Hz), 116.6 (dd,  $J = 22.3, 8.3$  Hz), 112.9 (dd,  $J = 190.6, 18.4$  Hz), 62.3 (d,  $J = 5.6$  Hz), 21.5, 16.2 (d,  $J = 6.6$  Hz);  $^{19}\text{F}$  NMR ( $\text{CDCl}_3$ , 377 MHz)  $\delta$  -105.0;  $^{31}\text{P}$  NMR ( $\text{CDCl}_3$ , 162 MHz)  $\delta$  14.84; IR (film): 2989, 1620, 1410, 1250, 1023, 969  $\text{cm}^{-1}$ ; HRMS (ESI) calcd for  $\text{C}_{11}\text{H}_{17}\text{O}_3\text{FP}$   $[\text{M}+\text{H}]^+$  247.0894, found 247.0888.

Diethyl (3,5-dichlorophenyl)phosphonate (**3t**)

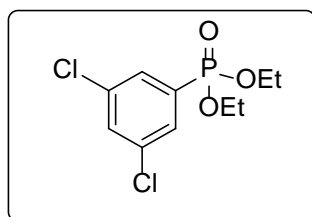

Yield 56% (63.3 mg). Colorless oil.  $^1\text{H}$  NMR (400 MHz,  $\text{CDCl}_3$ )  $\delta$  7.67 (dd,  $J = 13.6, 1.9$  Hz, 2H), 7.53 (t,  $J = 1.8$  Hz, 1H), 4.23-4.06 (m, 4H), 1.35 (t,  $J = 7.1$  Hz, 6H);  $^{13}\text{C}$  NMR (100 MHz,  $\text{CDCl}_3$ )  $\delta$  135.5 (d,  $J = 22.1$  Hz), 132.3 (d,  $J = 187.9$  Hz), 132.3 (d,  $J = 2.9$  Hz), 129.8 (d,  $J = 10.0$  Hz), 62.7 (d,  $J = 5.6$  Hz), 16.3 (d,  $J = 6.3$  Hz);  $^{31}\text{P}$  NMR ( $\text{CDCl}_3$ , 162 MHz)  $\delta$  15.17; IR (film): 2986, 1560, 1258, 1159, 1020, 971, 796  $\text{cm}^{-1}$ ; HRMS (ESI) calcd for  $\text{C}_{10}\text{H}_{14}\text{O}_3\text{Cl}_2\text{P}$   $[\text{M}+\text{H}]^+$ ; 283.0052, found 283.0044.

Diethyl (3,5-bis(trifluoromethyl)phenyl)phosphonate (**3u**)

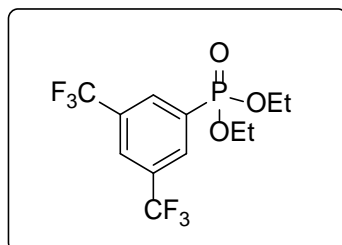

Yield 87% (121.4 mg). Colorless oil.  $^1\text{H}$  NMR (400 MHz,  $\text{CDCl}_3$ )  $\delta$  8.26 (d,  $J = 13.3$  Hz, 2H), 8.05 (s, 1H), 4.27-4.13 (m, 4H), 1.37 (t,  $J = 7.1$  Hz, 6H);  $^{13}\text{C}$  NMR (100 MHz,  $\text{CDCl}_3$ )  $\delta$  132.2 (d,  $J = 192.3$  Hz), 132.0 (dd,  $J = 34.1, 15.4$  Hz), 132.1, 131.9 (d,  $J = 8.1$  Hz), 125.9 (q,  $J = 3.5$  Hz), 120.1 (qd,  $J = 270.9, 2.1$  Hz), 63.0 (d,  $J = 5.7$  Hz), 16.2 (d,  $J = 6.2$  Hz);  $^{19}\text{F}$  NMR ( $\text{CDCl}_3$ , 377 MHz)  $\delta$  -63.2;  $^{31}\text{P}$  NMR ( $\text{CDCl}_3$ , 162 MHz)  $\delta$  14.25; IR (film): 2988, 1616, 1368, 1281, 1136, 1021, 972, 682  $\text{cm}^{-1}$ ; HRMS (ESI) calcd for  $\text{C}_{12}\text{H}_{14}\text{O}_3\text{F}_6\text{P}$   $[\text{M}+\text{H}]^+$  351.0579, found 351.0572.

Diethyl thiophen-3-ylphosphonate (**3v**)<sup>9</sup>

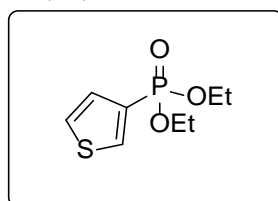

Yield 58% (51.1 mg). Colorless oil.  $^1\text{H}$  NMR (400 MHz,  $\text{CDCl}_3$ )  $\delta$  7.99 (ddd,  $J = 8.2,$

2.8, 1.1 Hz, 1H), 7.45-7.42 (m, 1H), 7.35-7.32 (m, 1H), 4.18-1.06 (m, 4H), 1.32 (t,  $J = 1.32$  Hz, 6H);  $^{13}\text{C}$  NMR (100 MHz,  $\text{CDCl}_3$ )  $\delta$  135.3 (d,  $J = 18.2$  Hz), 129.4 (d,  $J = 196.7$  Hz), 128.9 (d,  $J = 16.7$  Hz), 127.1 (d, 20.0 Hz), 62.1 (d,  $J = 5.3$  Hz), 16.3 (d,  $J = 6.5$  Hz);  $^{31}\text{P}$  NMR ( $\text{CDCl}_3$ , 162 MHz)  $\delta$  13.71; IR (film): 2987, 1501, 1392, 1246, 1021, 966, 793, 657  $\text{cm}^{-1}$ .

Diethyl thiophen-2-ylphosphonate (**3w**)<sup>3</sup>

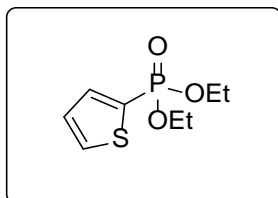

Yield 46% (40.7 mg). Colorless oil.  $^1\text{H}$  NMR (400 MHz,  $\text{CDCl}_3$ )  $\delta$  7.71-7.66 (m, 2H), 7.20-7.17 (m, 2H), 7.21-4.08 (m, 4H), 1.34 (t,  $J = 7.1$  Hz, 6H);  $^{13}\text{C}$  NMR (100 MHz,  $\text{CDCl}_3$ )  $\delta$  136.6 (d,  $J = 12.4$  Hz), 133.3 (d,  $J = 7.5$  Hz), 128.0 (d,  $J = 18.4$  Hz), 127.8 (d,  $J = 210.0$ ), 62.6 (d,  $J = 5.4$  Hz), 16.2 (d,  $J = 6.8$  Hz);  $^{31}\text{P}$  NMR ( $\text{CDCl}_3$ , 162 MHz)  $\delta$  12.40; IR (film): 2984, 1410, 1251, 1019, 970, 749, 653  $\text{cm}^{-1}$ .

## 6) Reference

1. R. Zhuang, J. Xu, Z. Cai, G. Tang, M. Fang, Y. Zhao, *Org. Lett.*, 2011, **13**, 2110.
2. M. Matsumura, Y. Dong, N. Kakusawa, S. Yasuike, *Chem. Pharm. Bull.*, 2015, **63**, 130.
3. C. Liu, M. Szostak, *Angew. Chem., Int. Ed.*, 2017, **56**, 12718.
4. E. Jablonkai, G. Keglevich, *Tetrahedron Lett.*, 2013, **4**, 4185.
5. M. Kalek, M. Jezowska, J. Stawomslo, *Adv. Synth. Catal.*, 2009, **351**, 3207.
6. I. Řehoř, V. Kubiček, J. Kotek, P. Harmann, I. Lukeš, J. Száková, L. V. Elst, R. N. Muller, J. A. Peters, *J. Mater. Chem.*, 2009, **19**, 1494.
7. R. S. Shaikh, S. J. S. Düsel, B. König, *ACS Catal.*, 2016, **6**, 8410.
8. R. A. Dhokale, S. B. Mhaske, *Org. Lett.*, 2013, **15**, 2218.
9. M. Lilley, B. Mambwe, R. F. W. Jackson, R. Muimo, *Chem. Commun.*, 2014, **50**, 9343.
10. K. Xu, F. Yang, G. Zhang, Y. Wu, *Green Chem.*, **2013**, *15*, 1055.



## 7) $^1\text{H}$ and $^{13}\text{C}$ NMR spectra

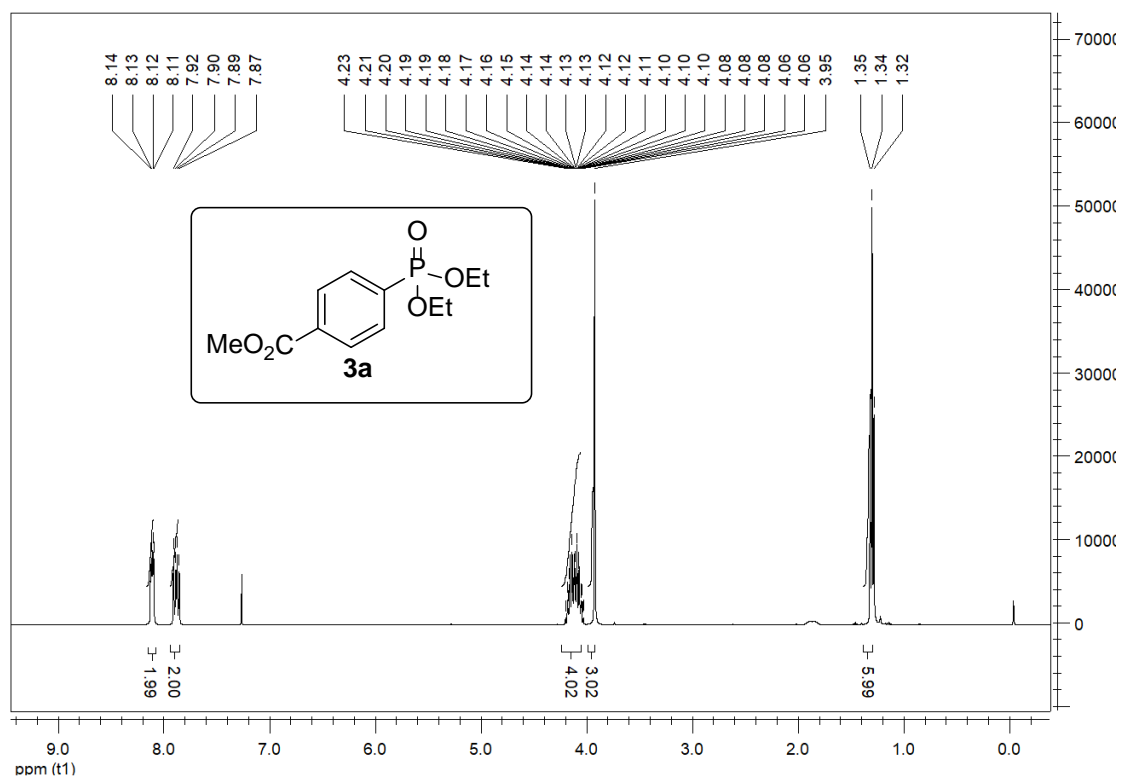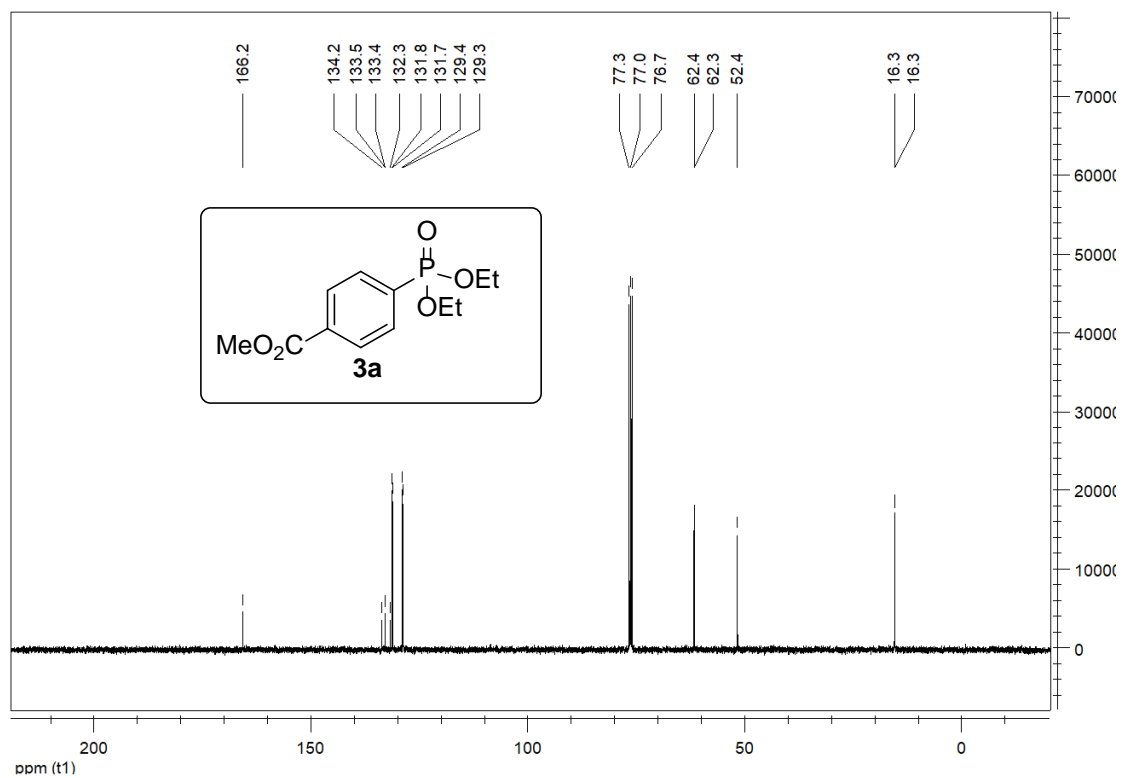

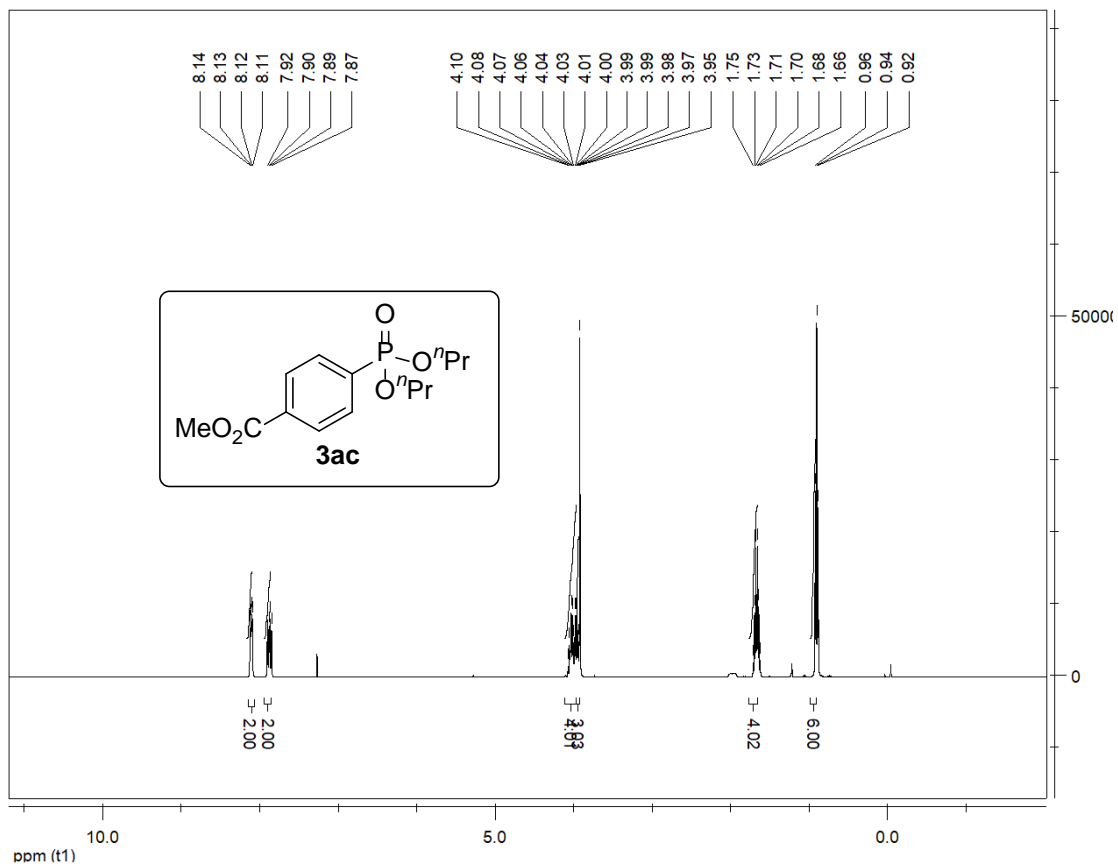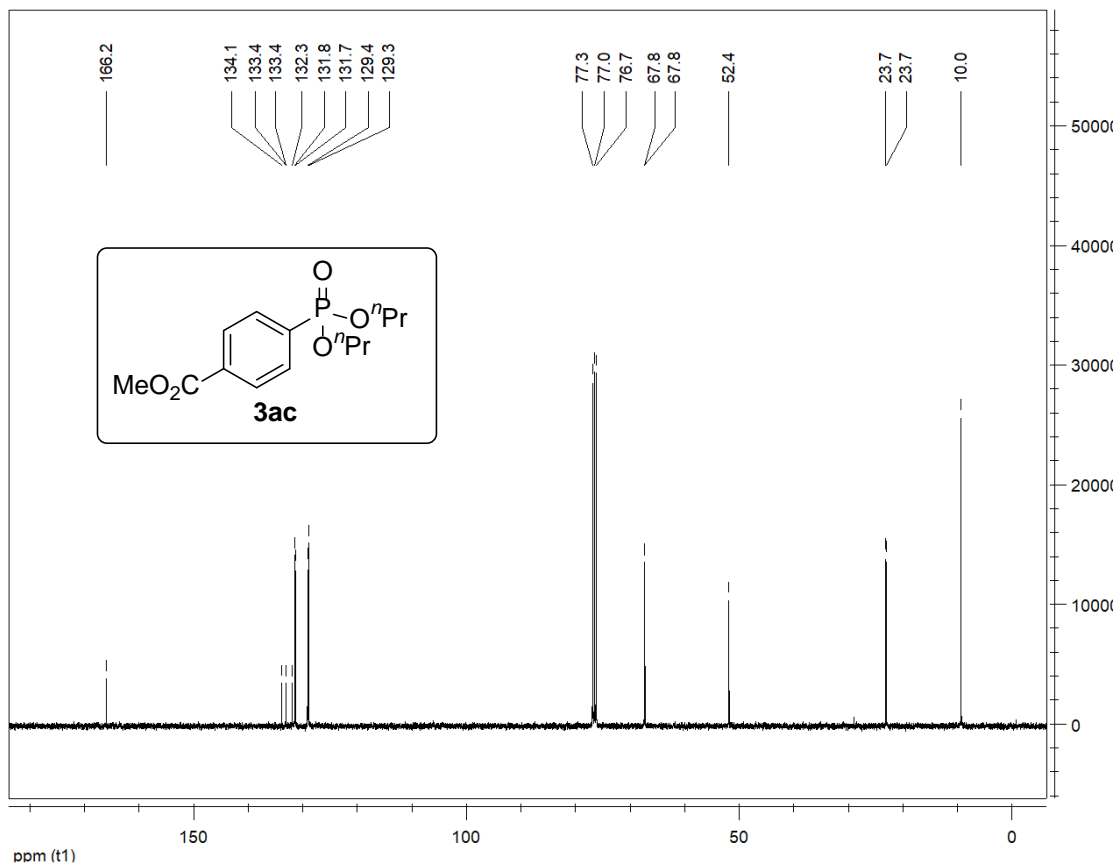

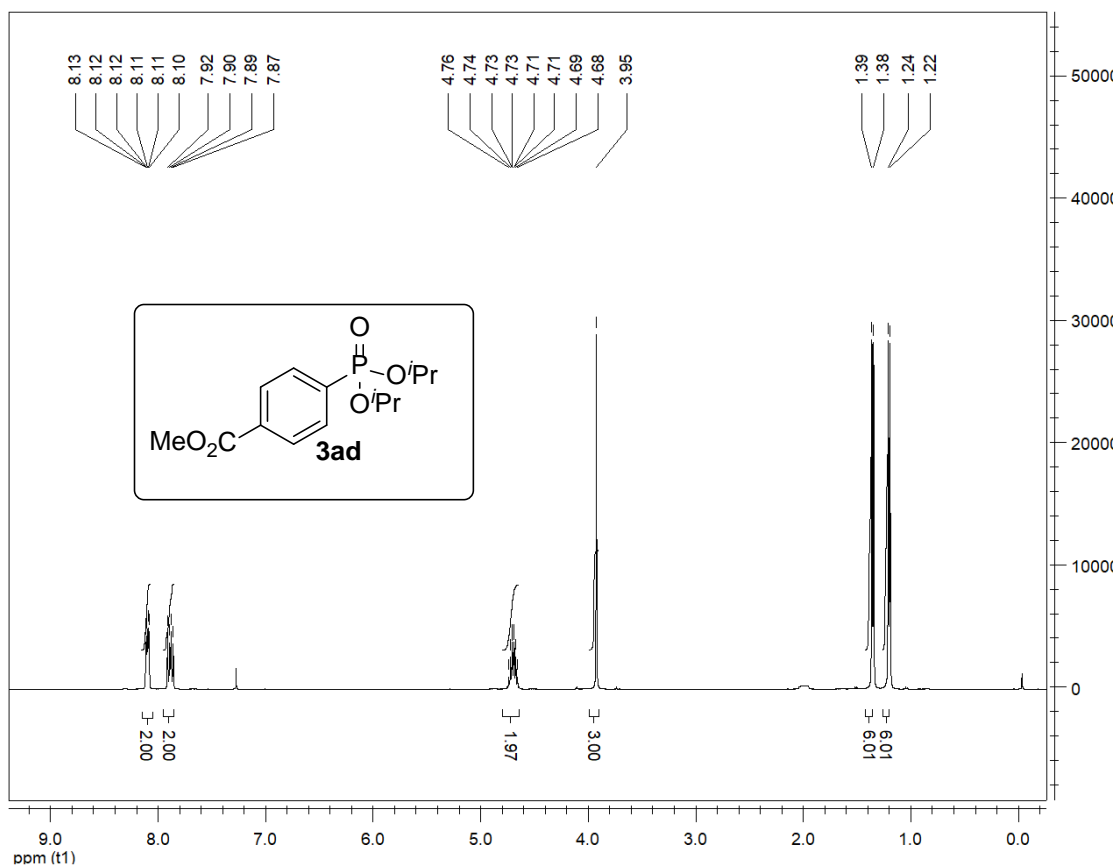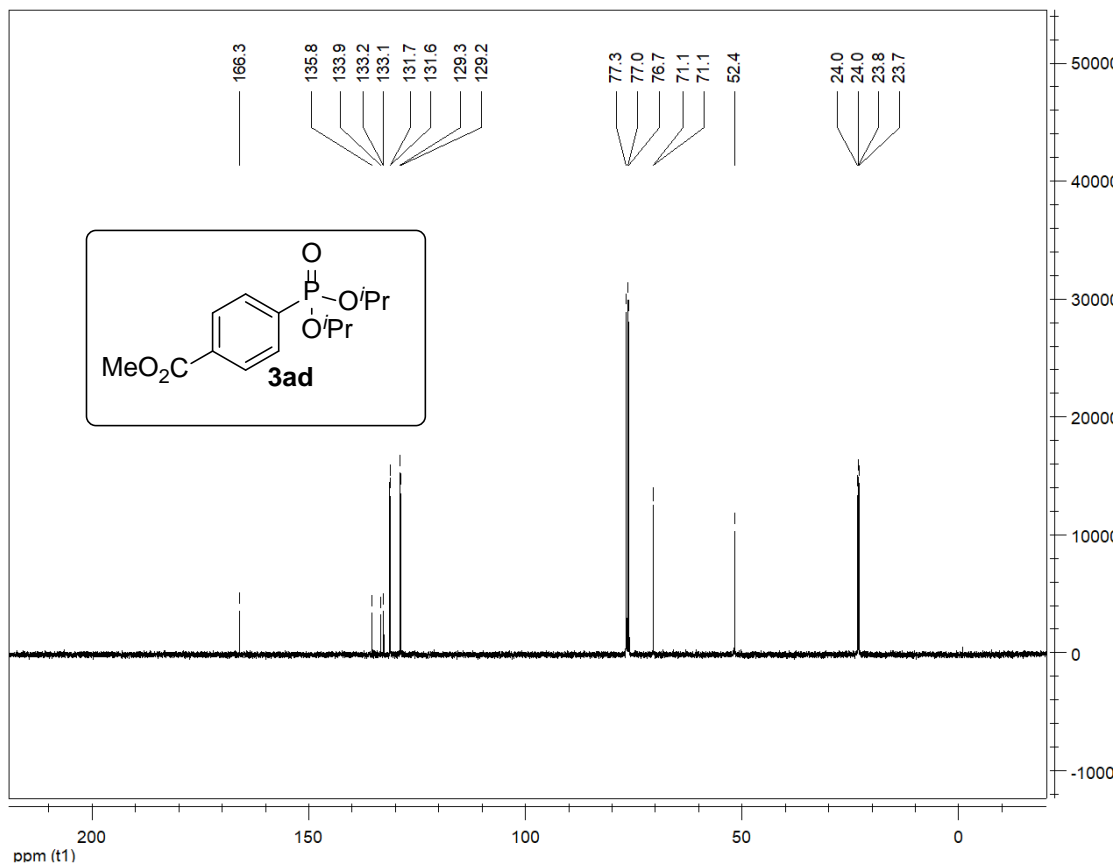

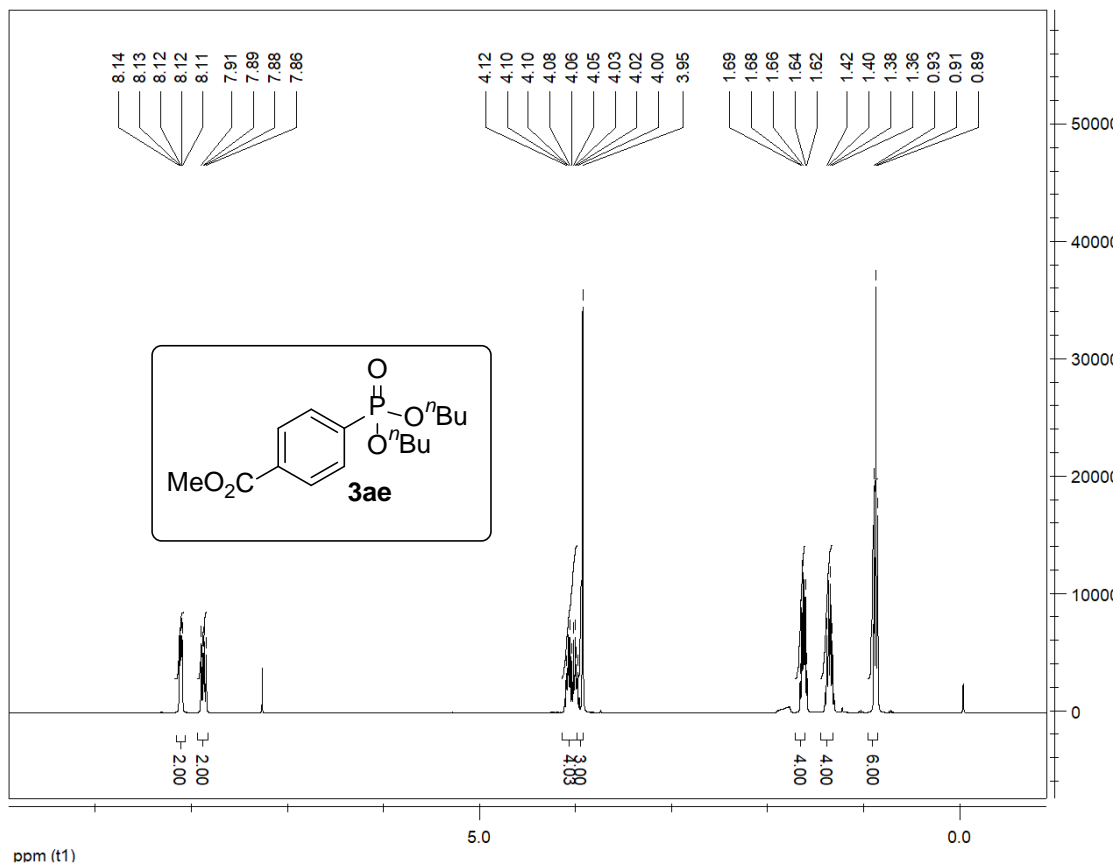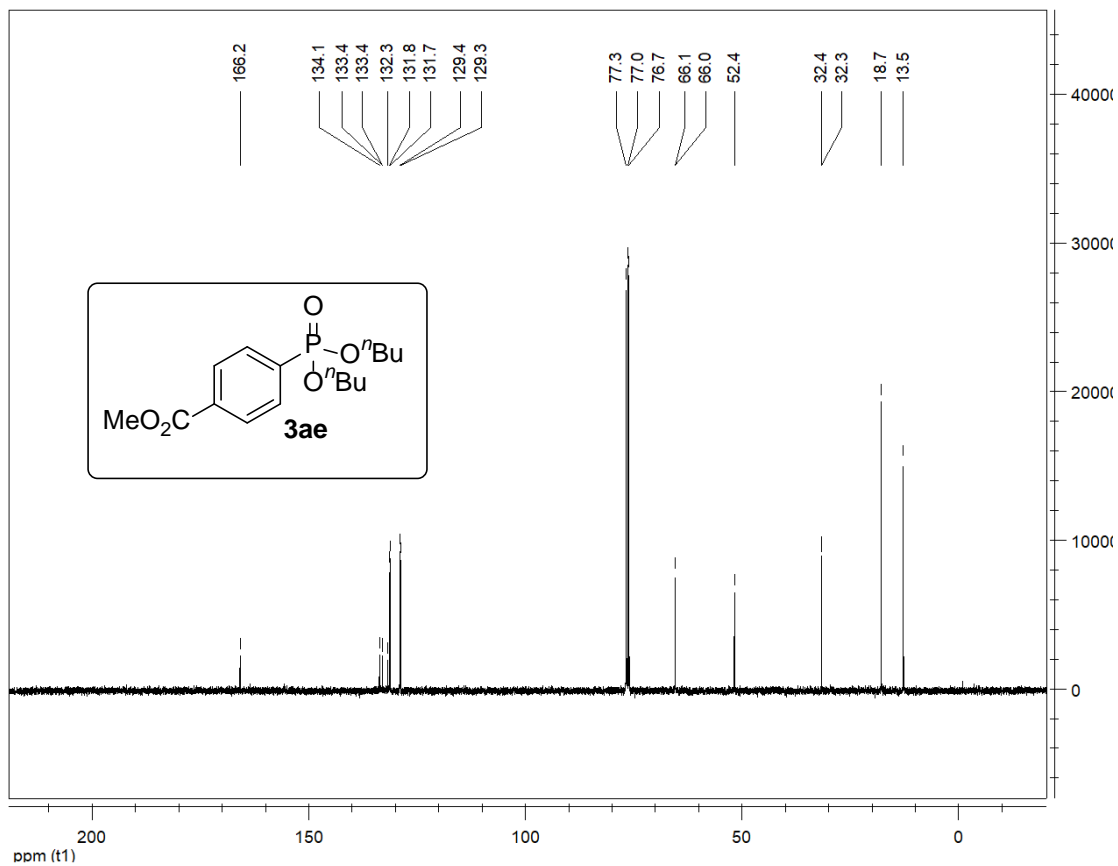

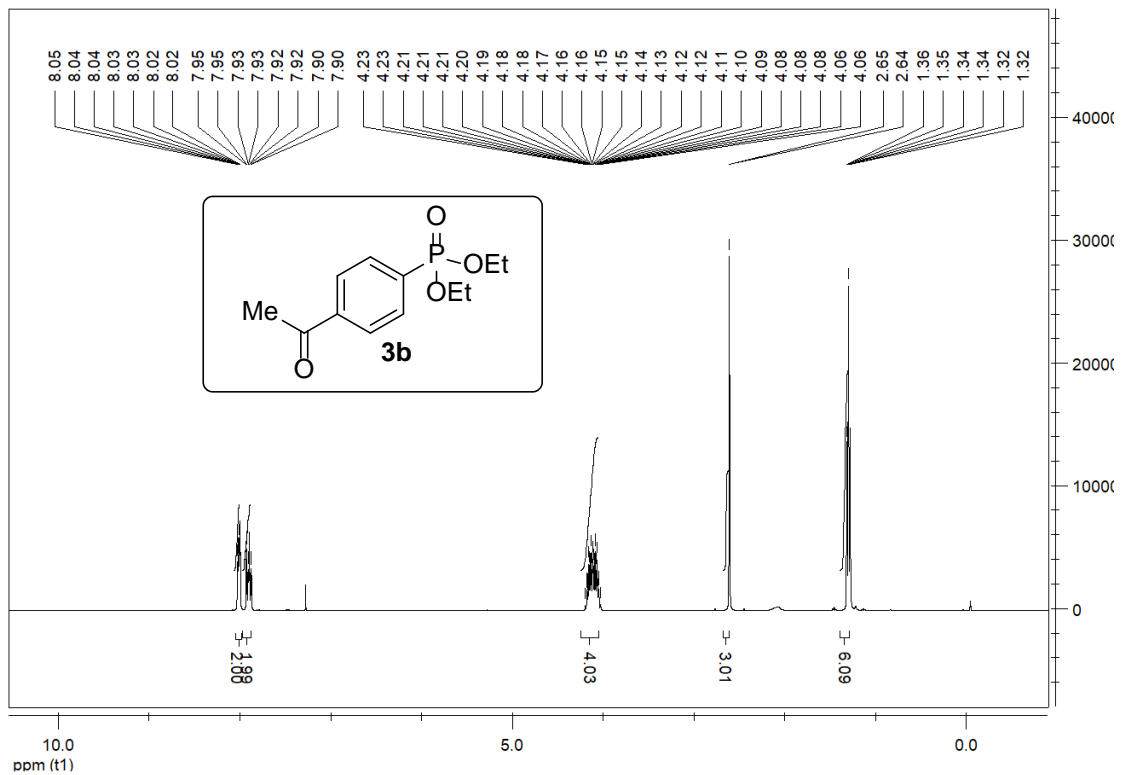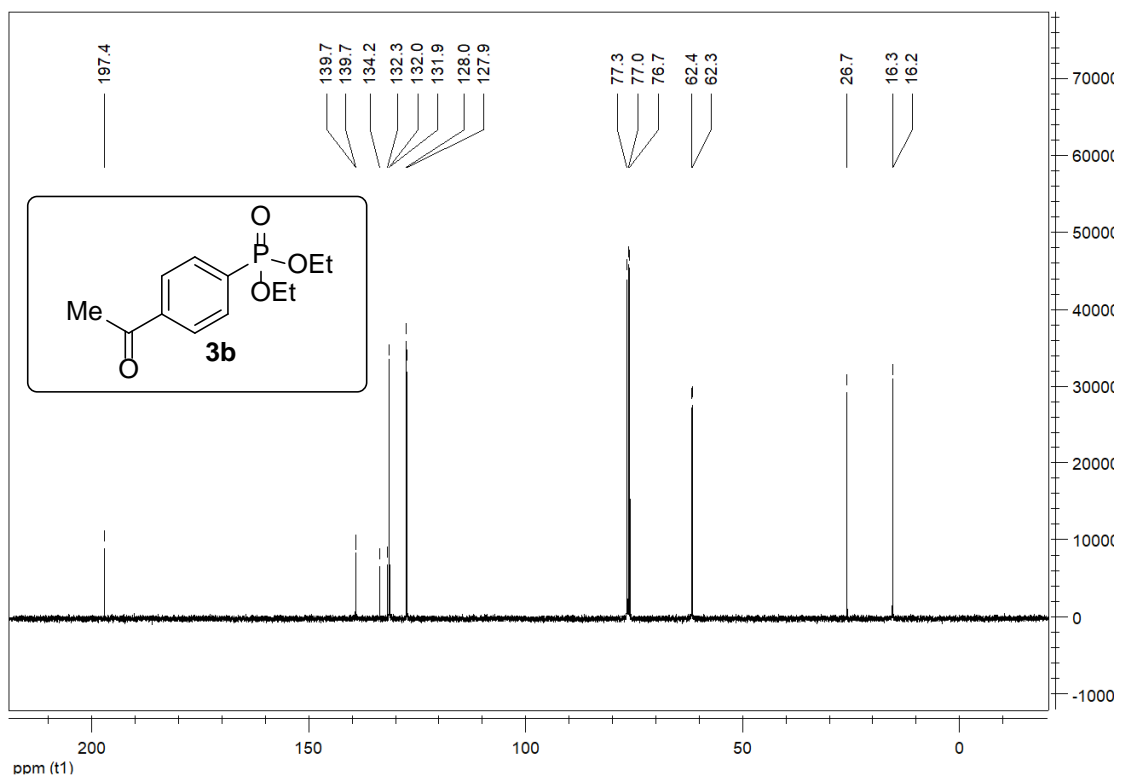

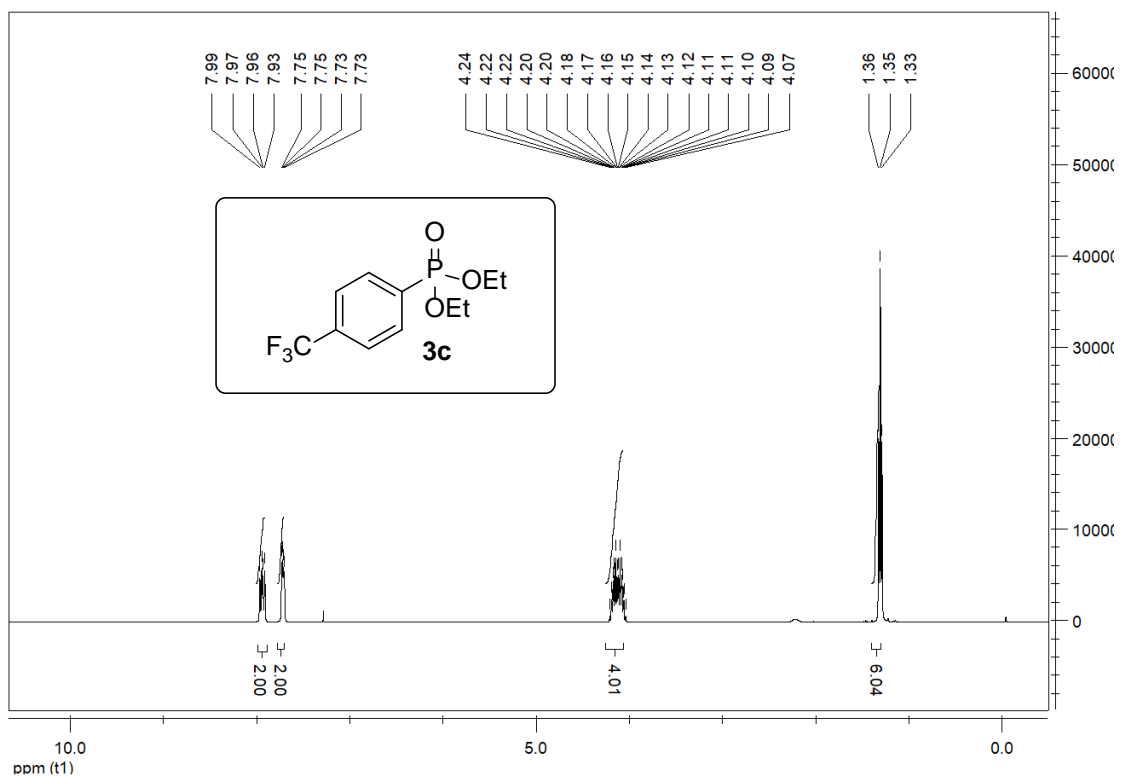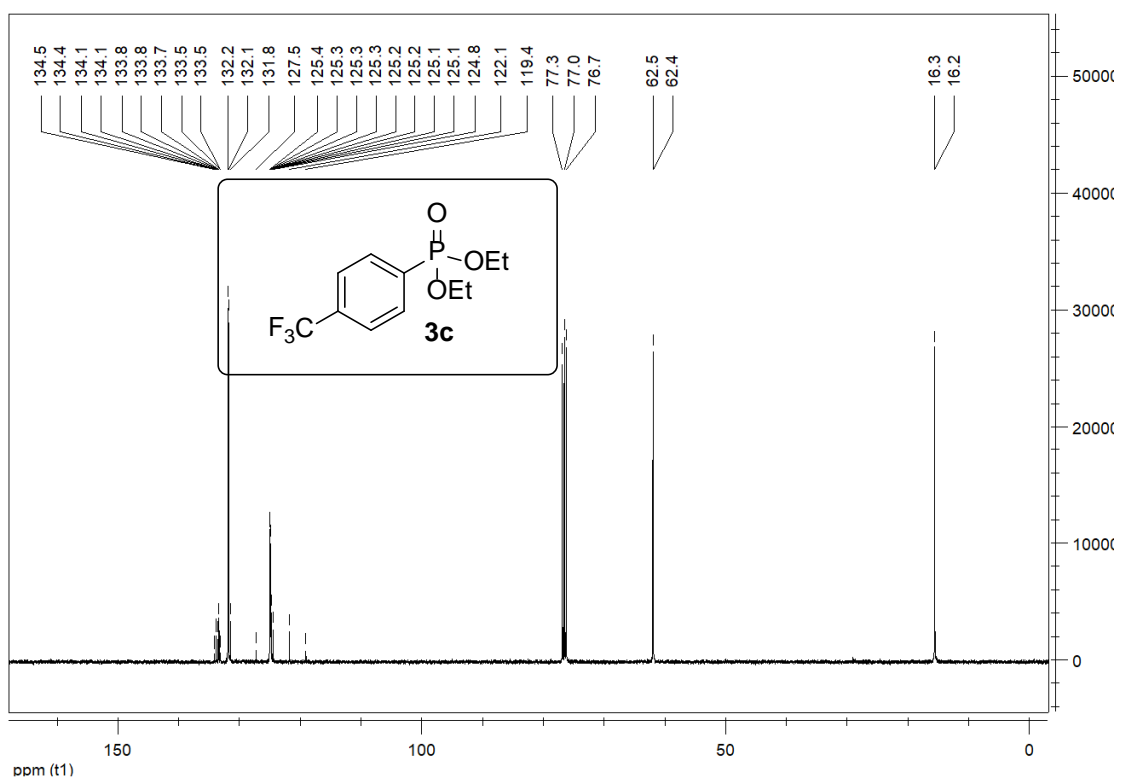

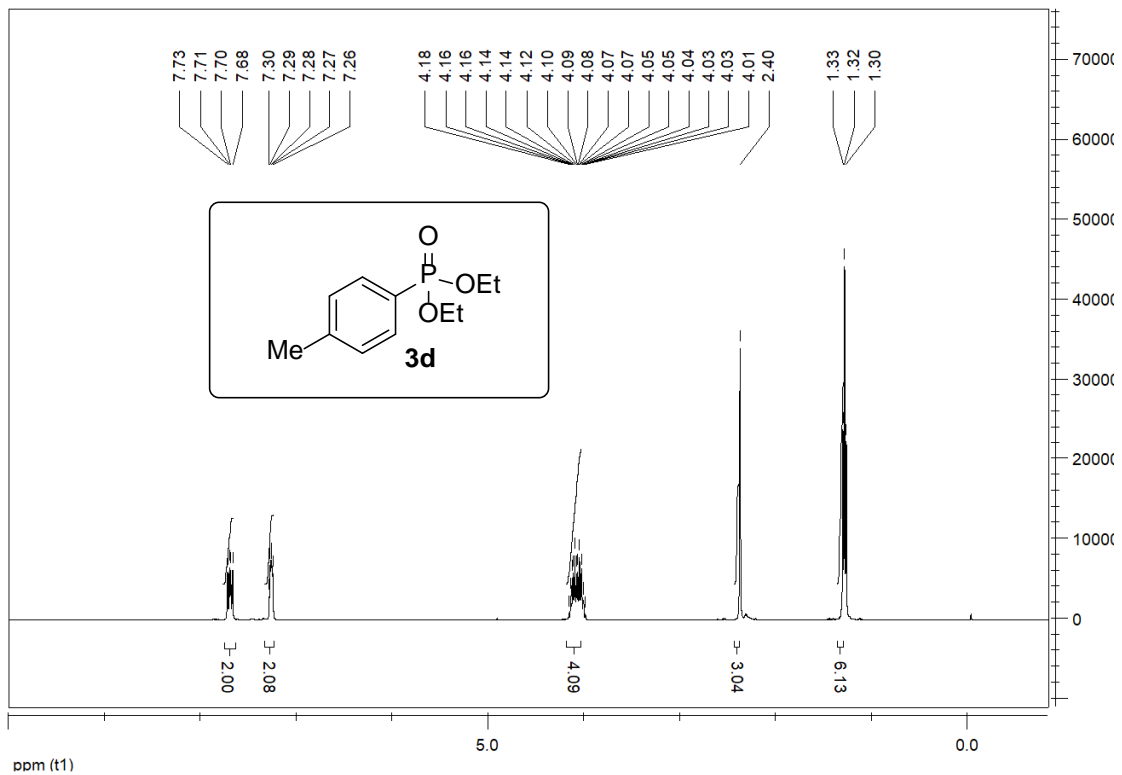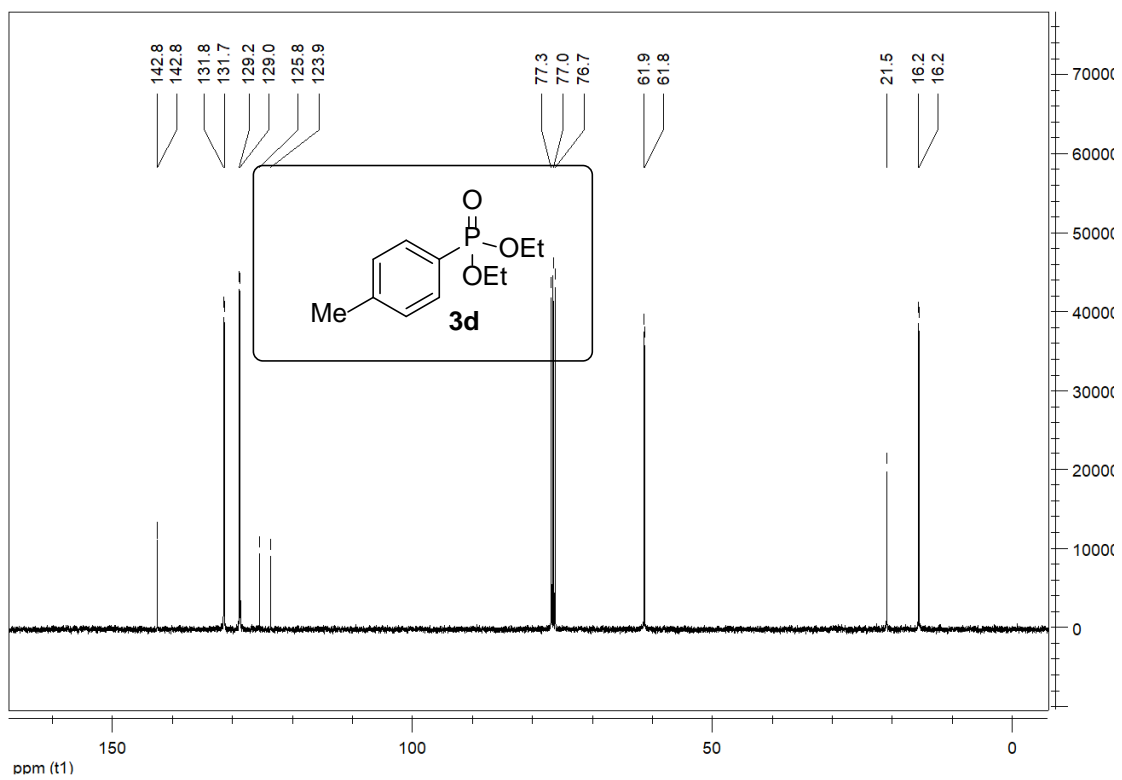





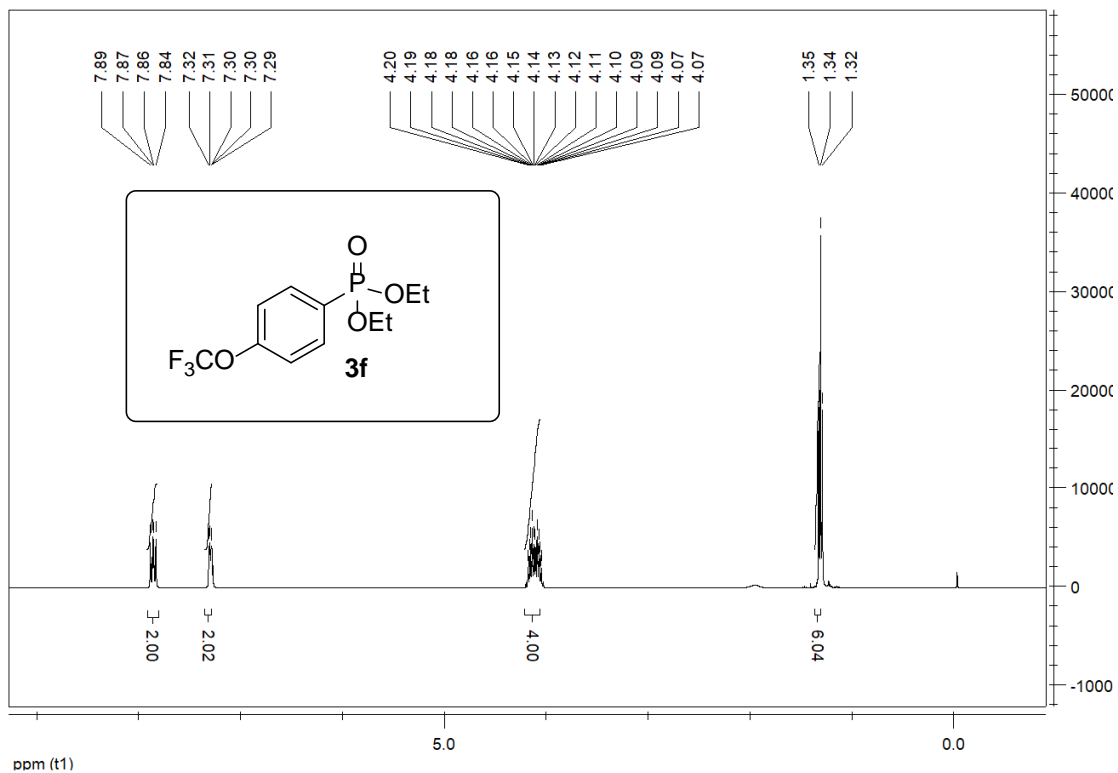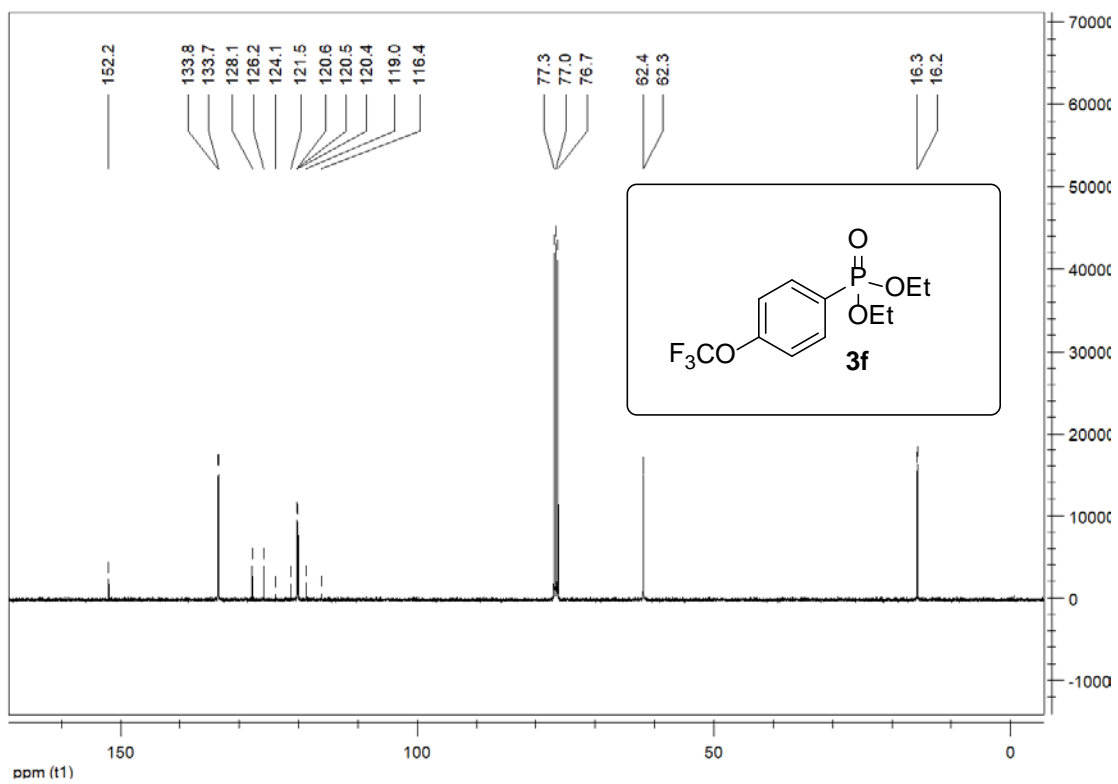

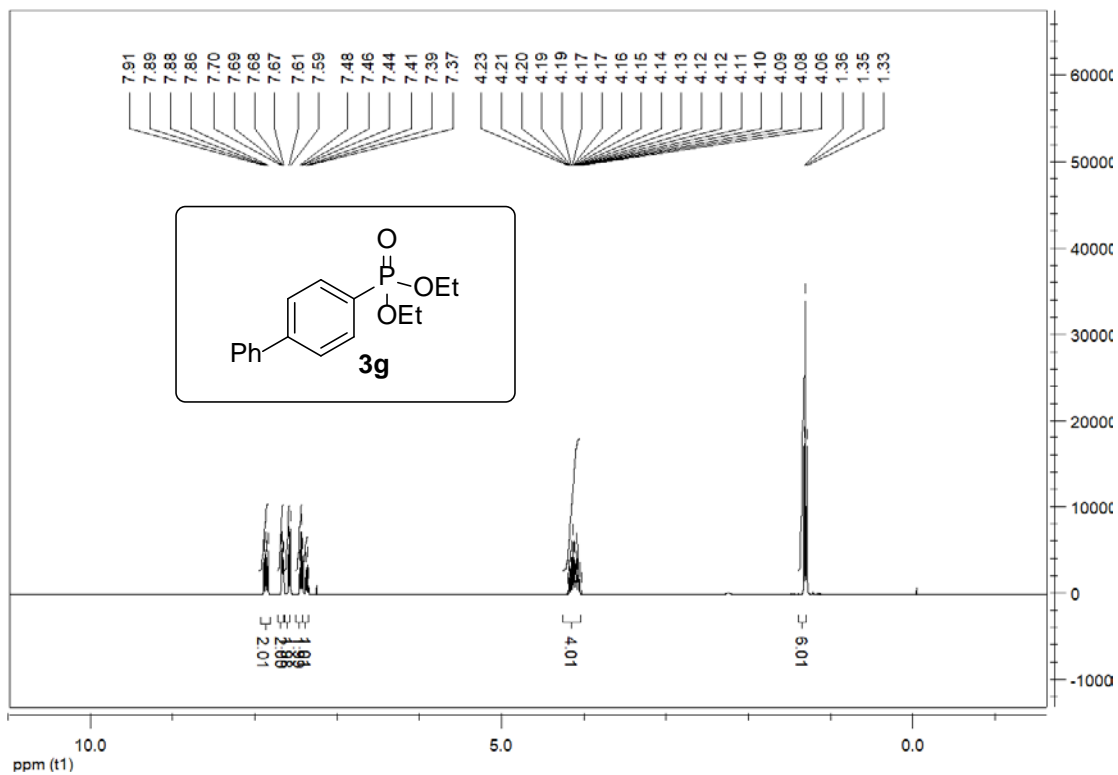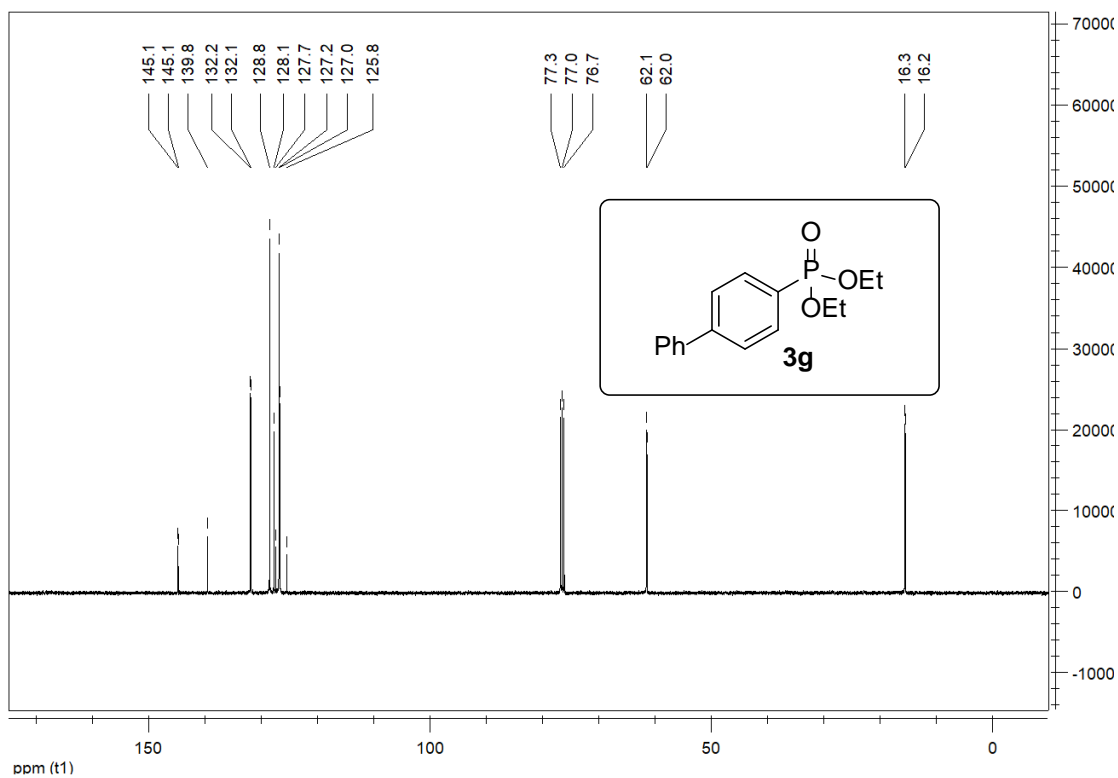

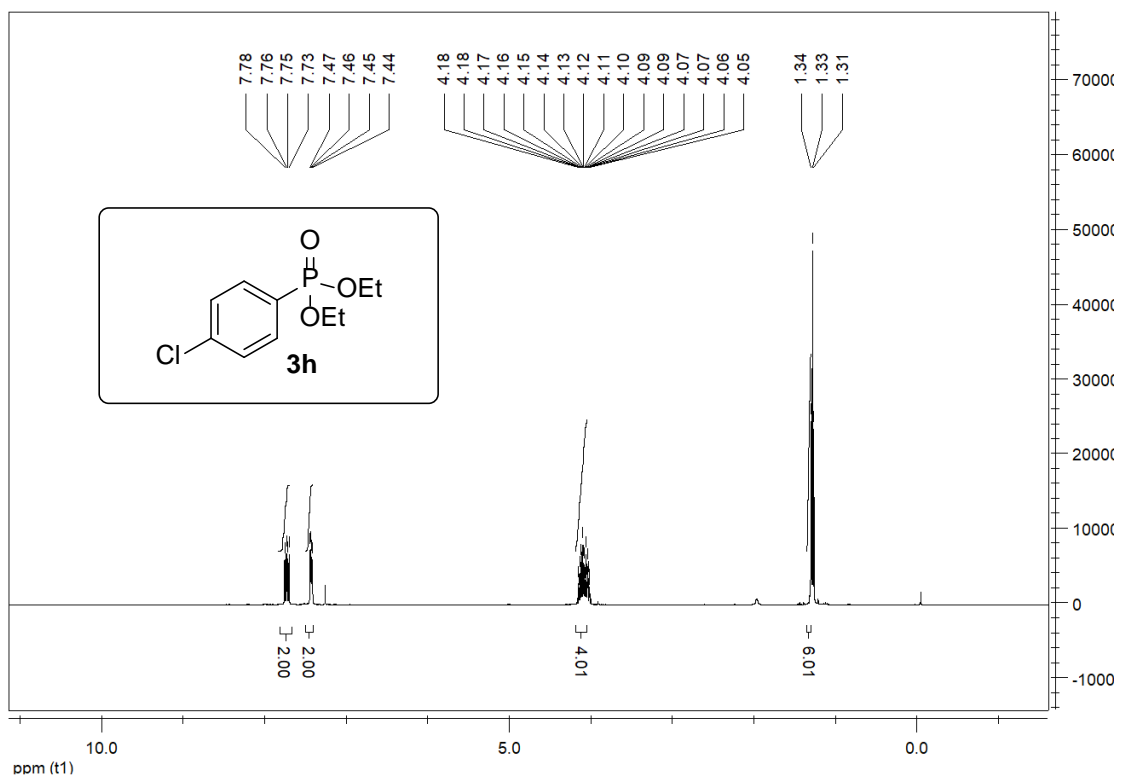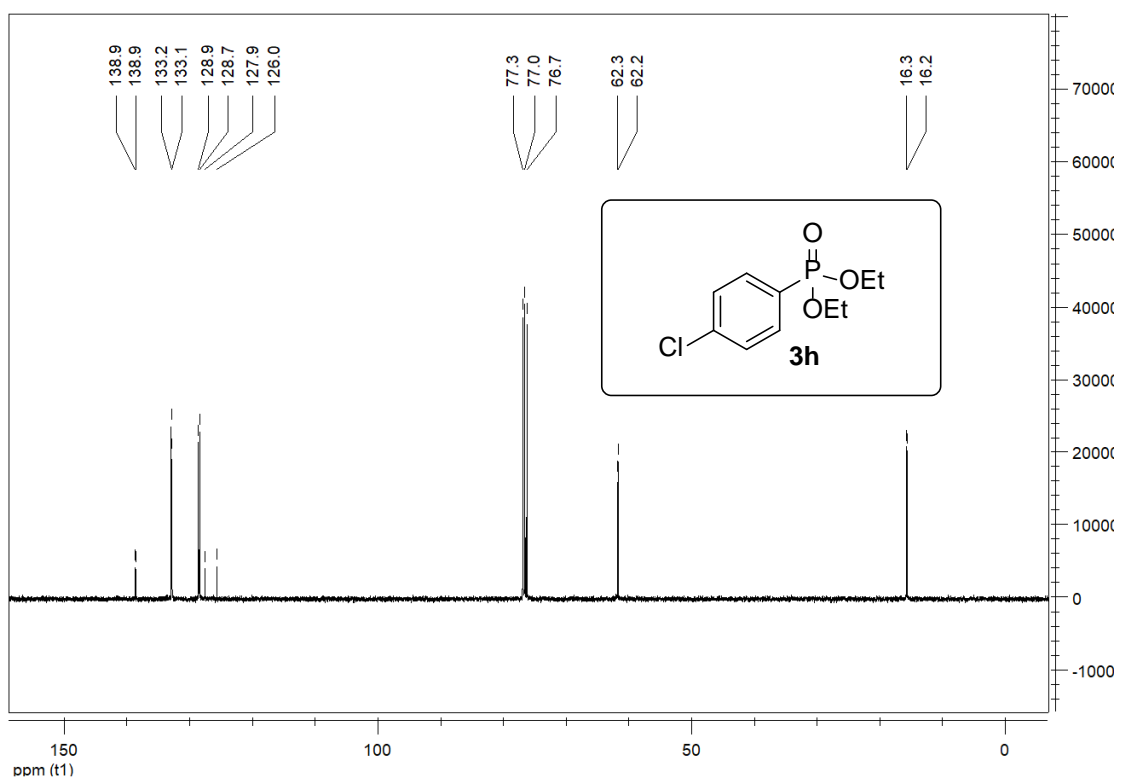

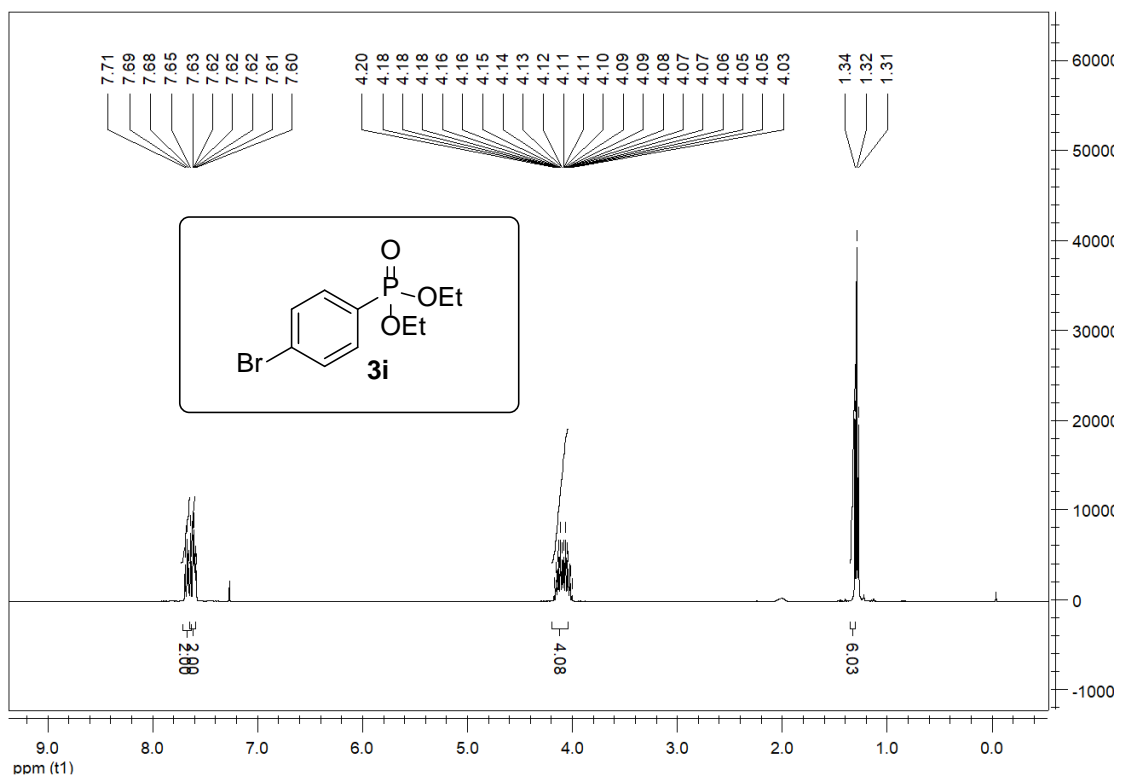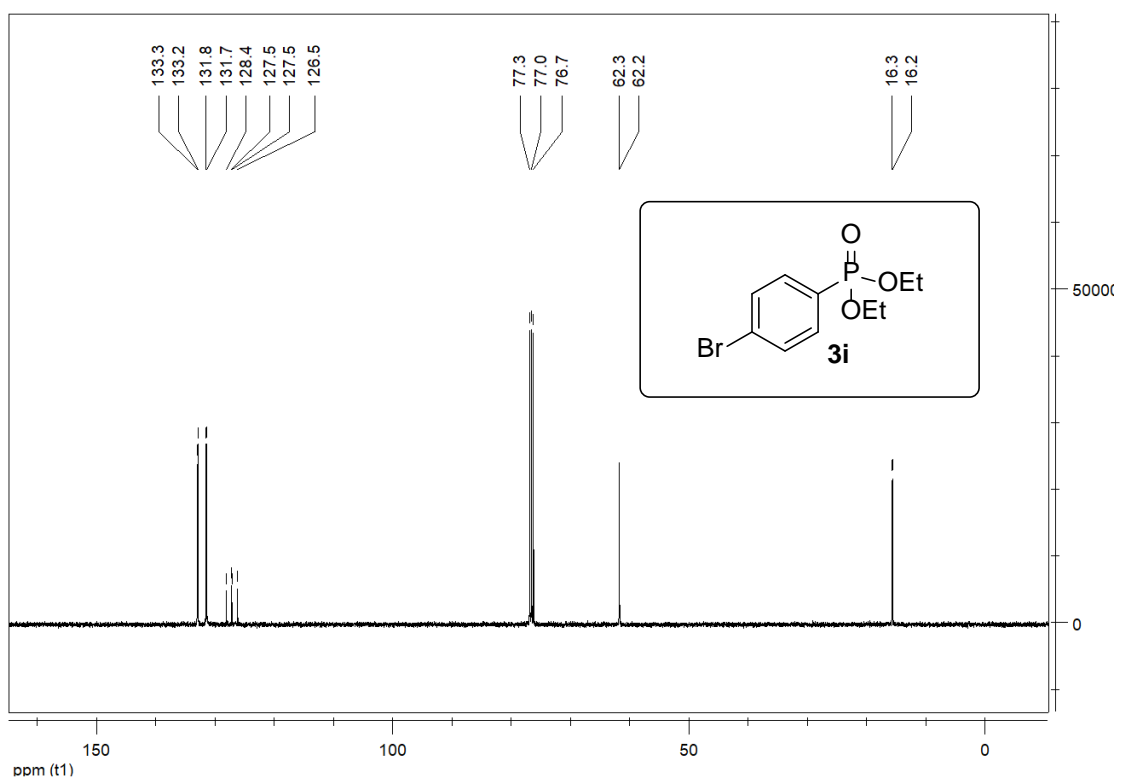

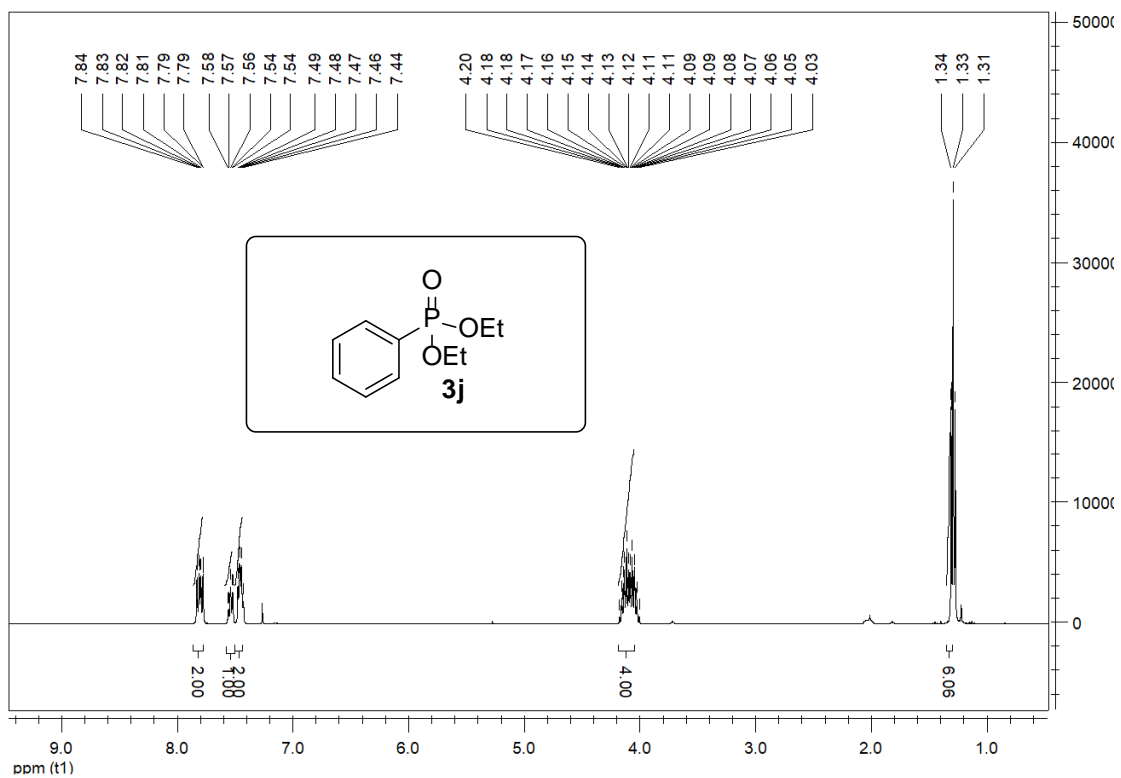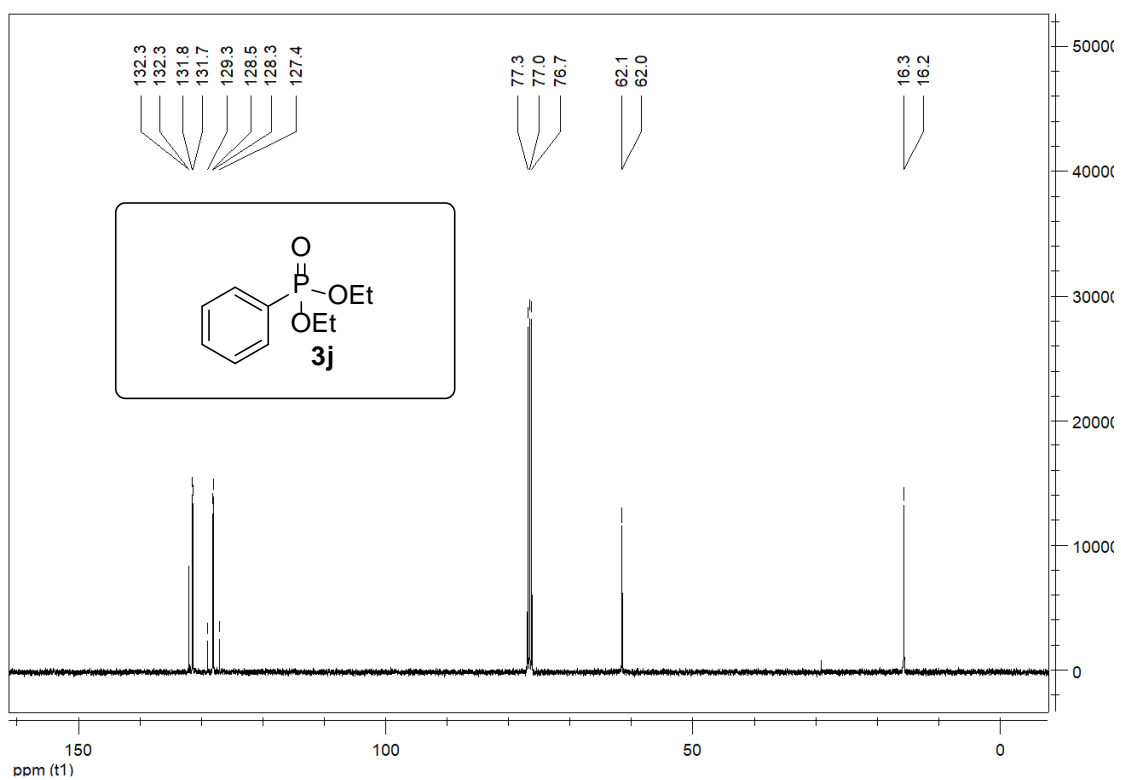

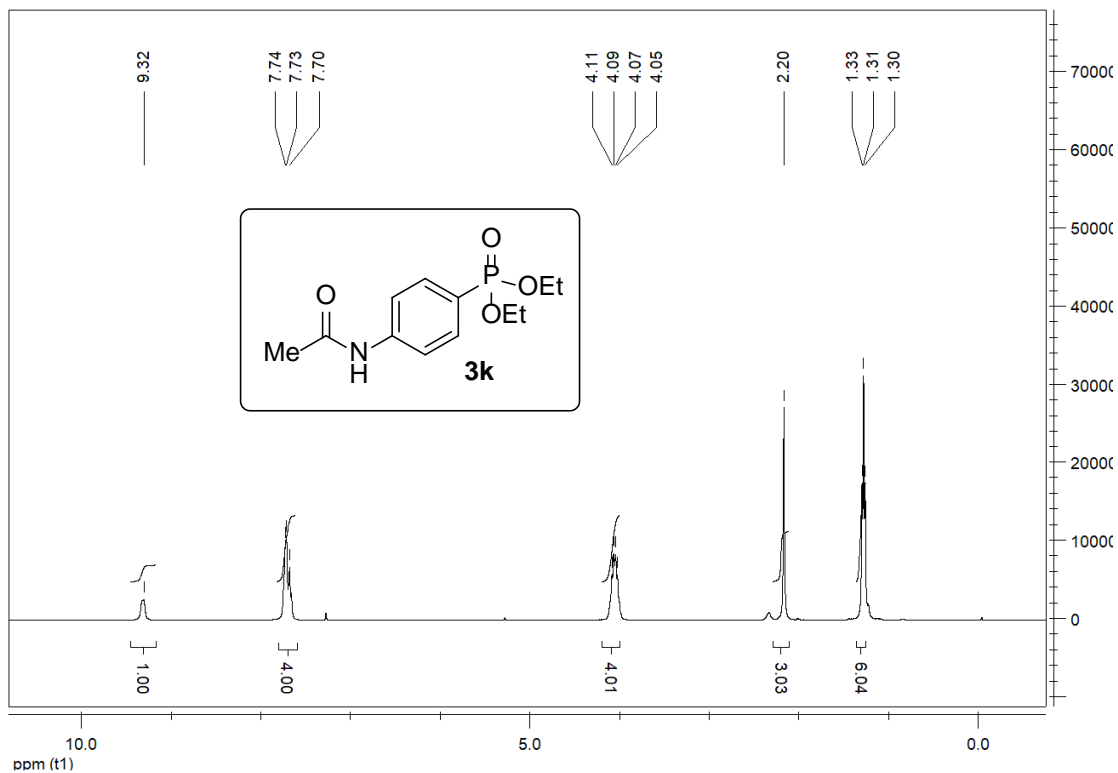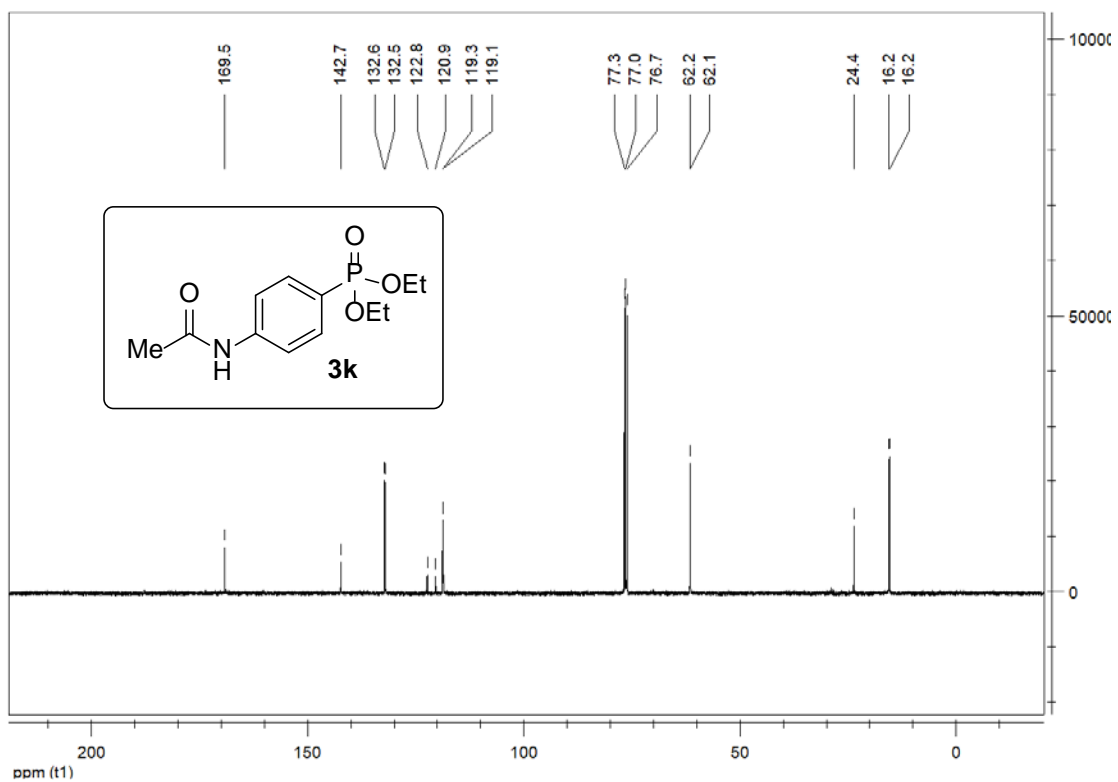

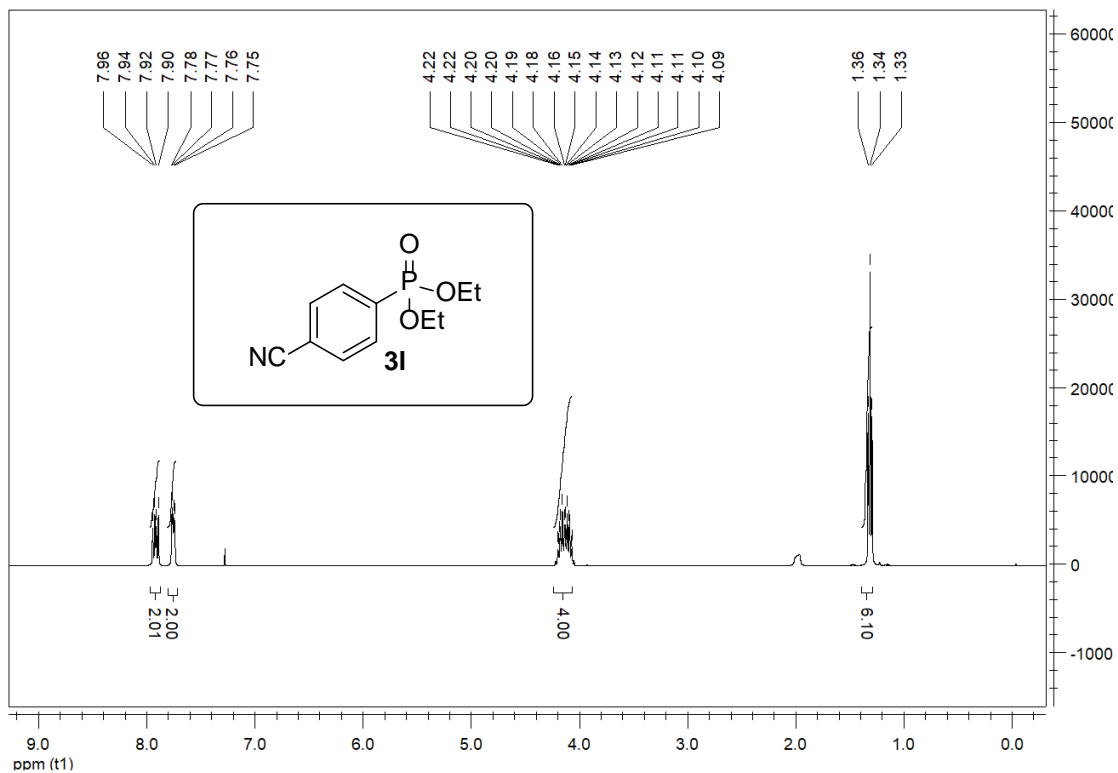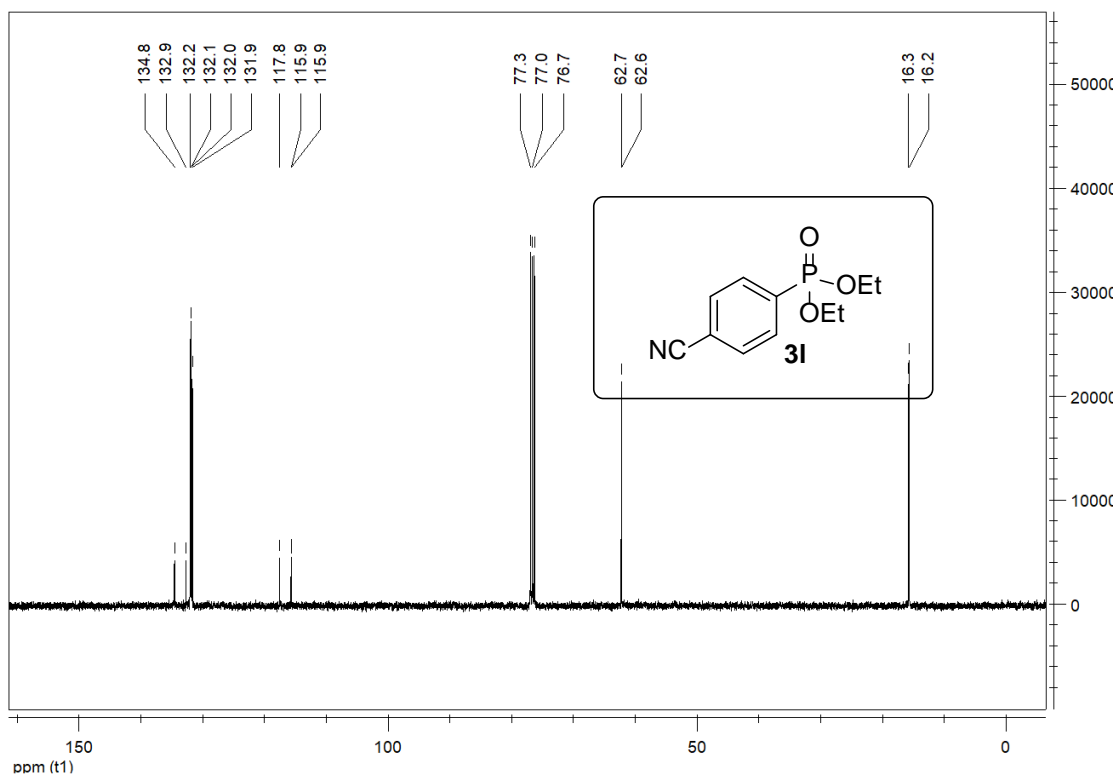

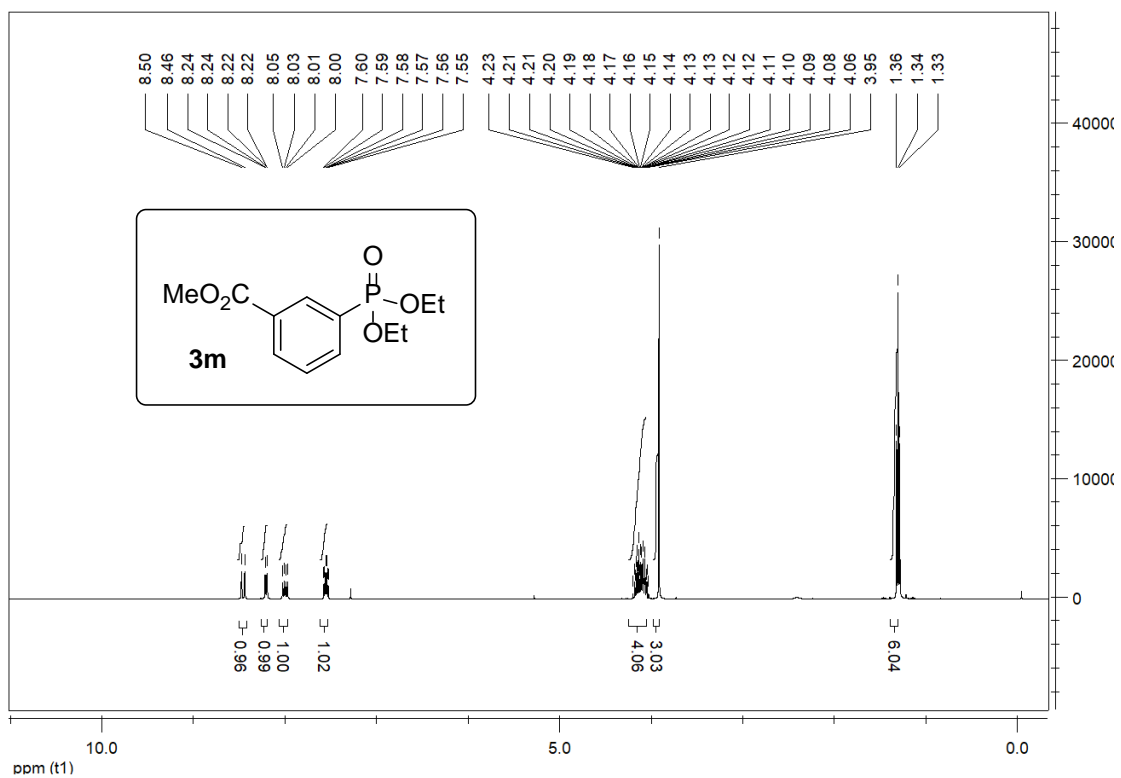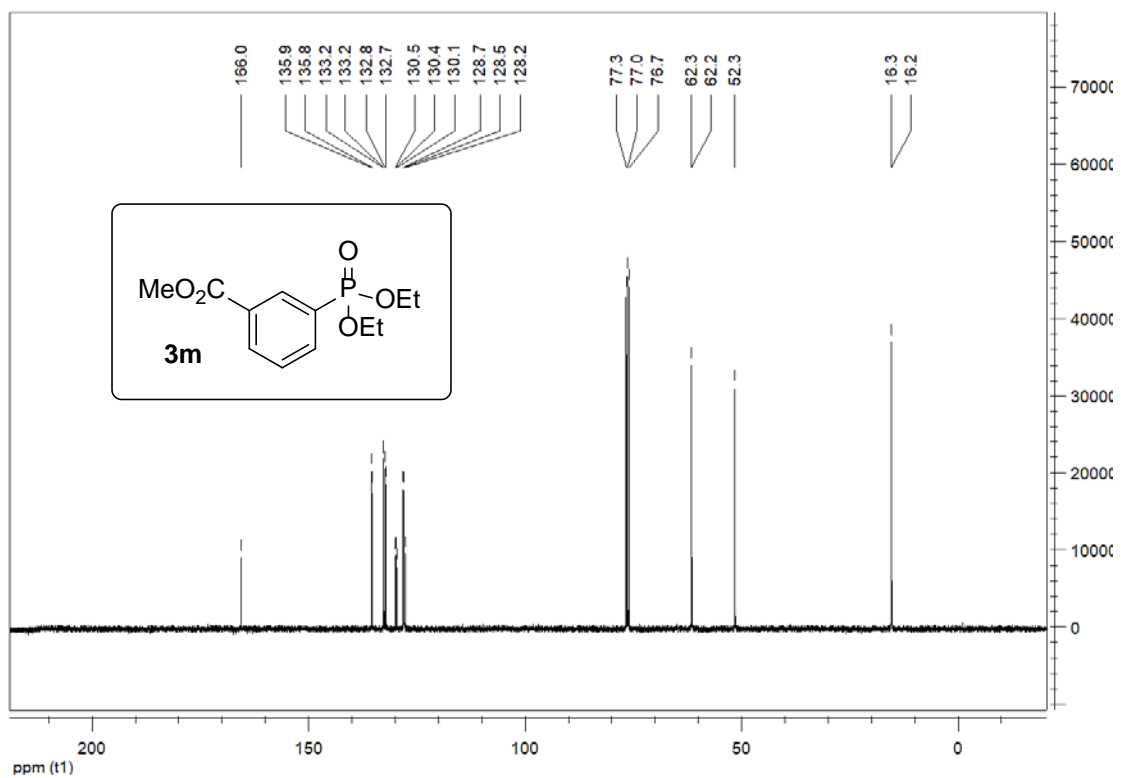



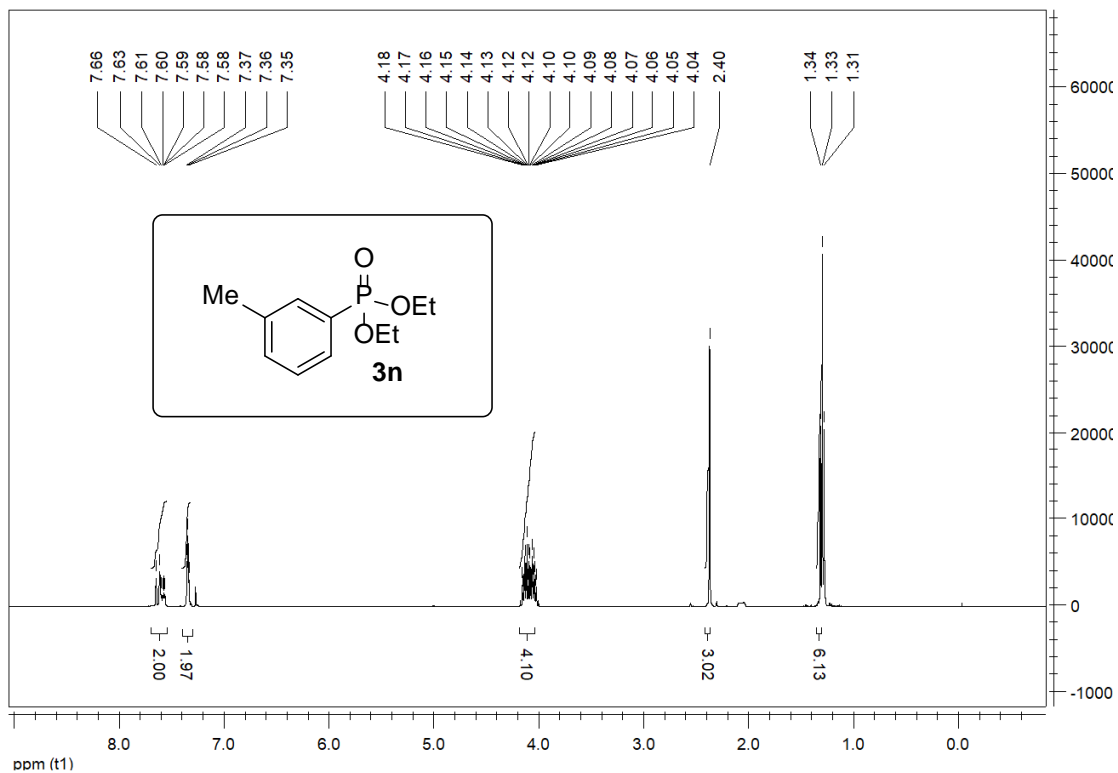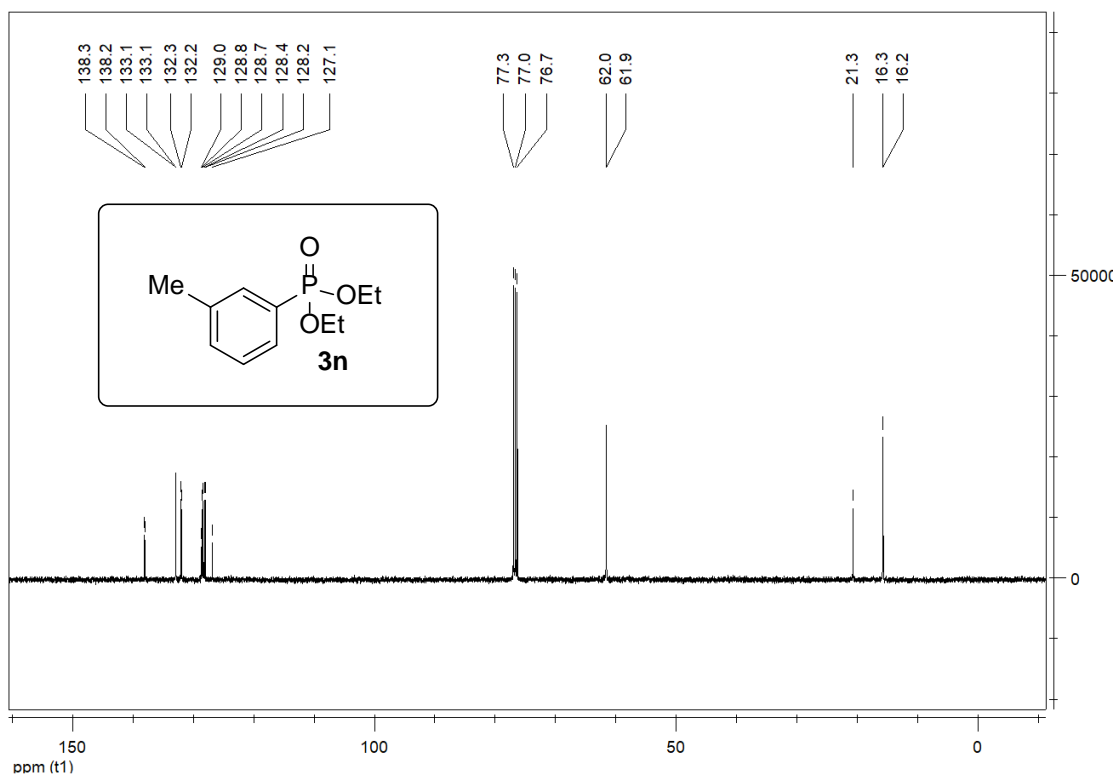

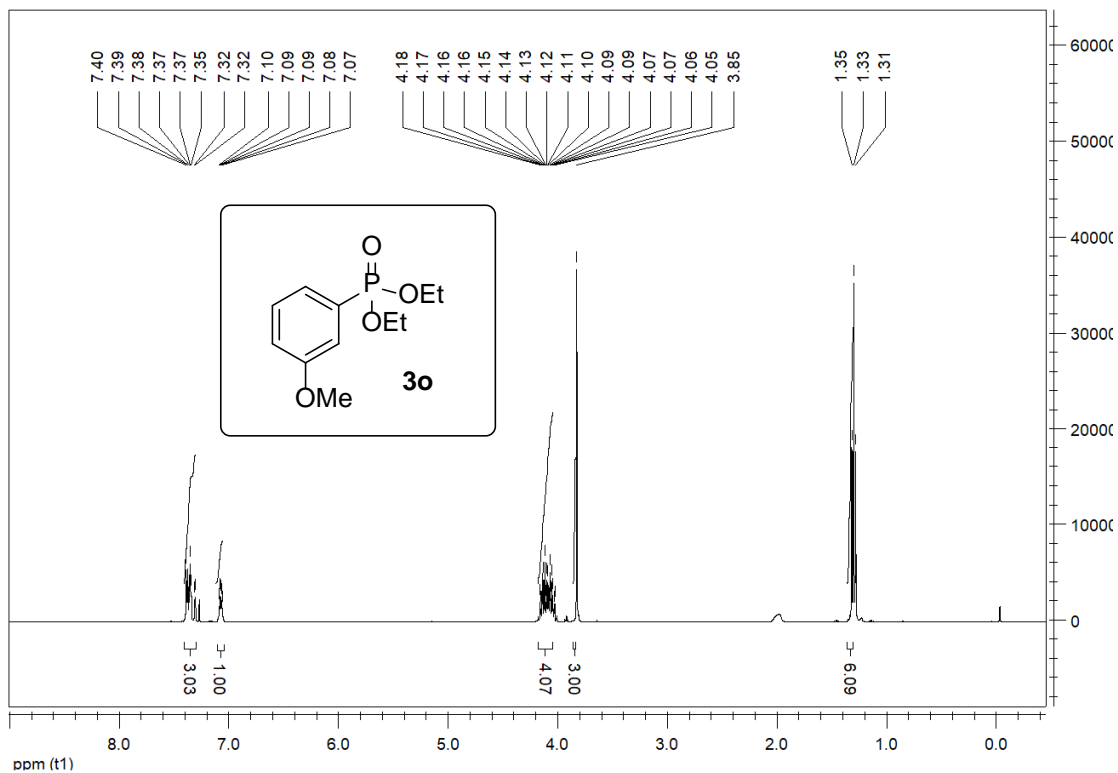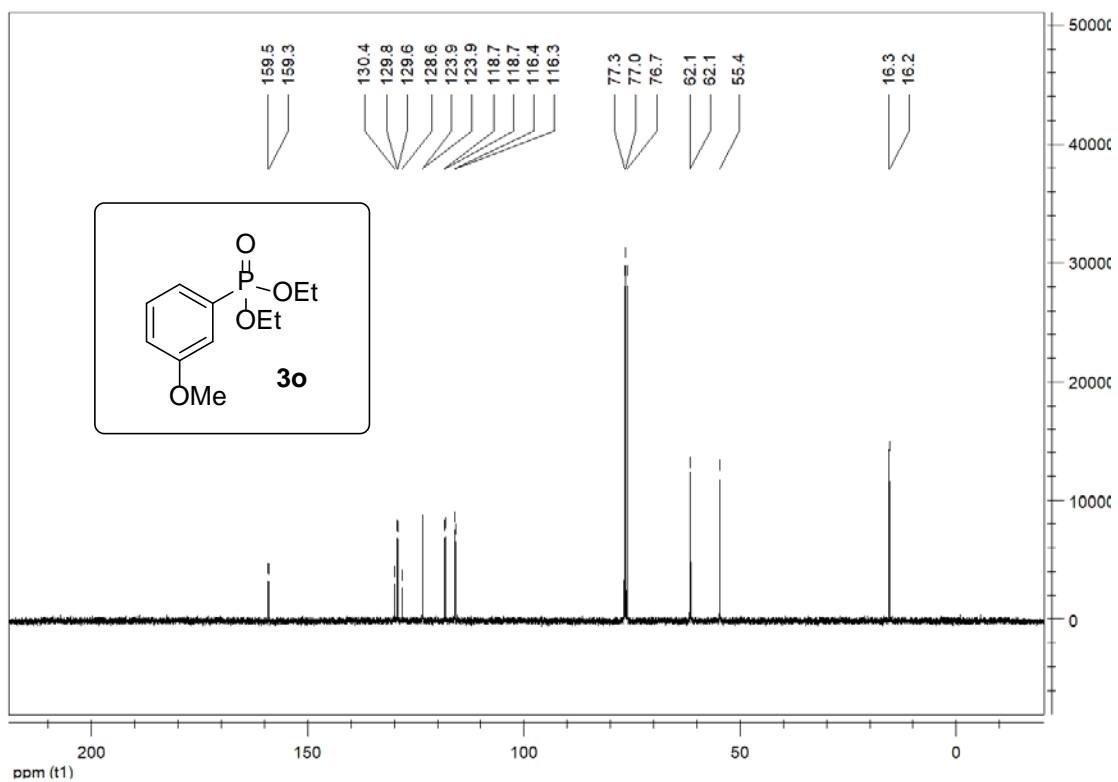

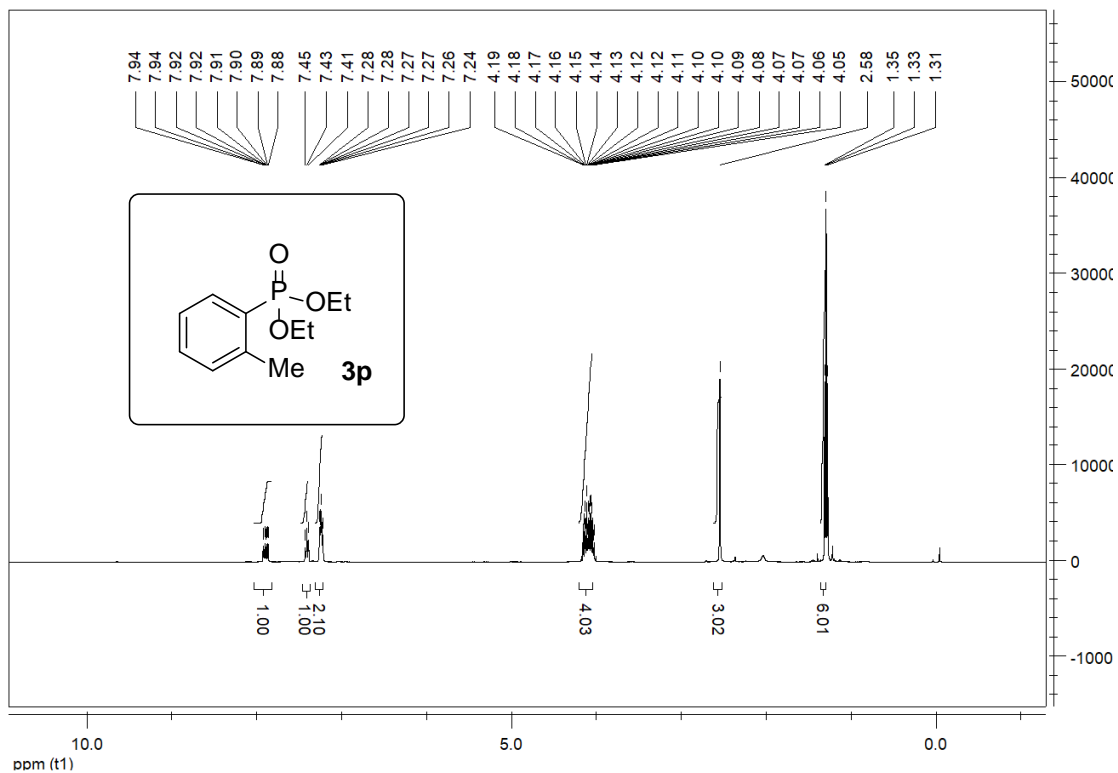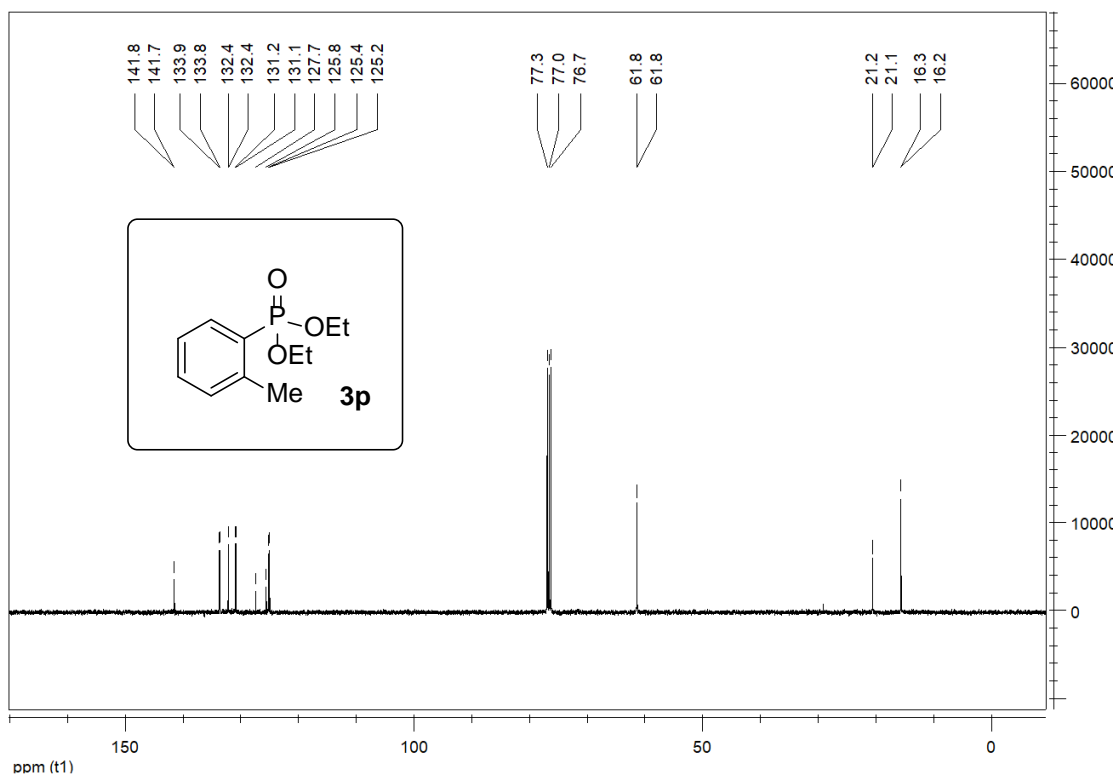



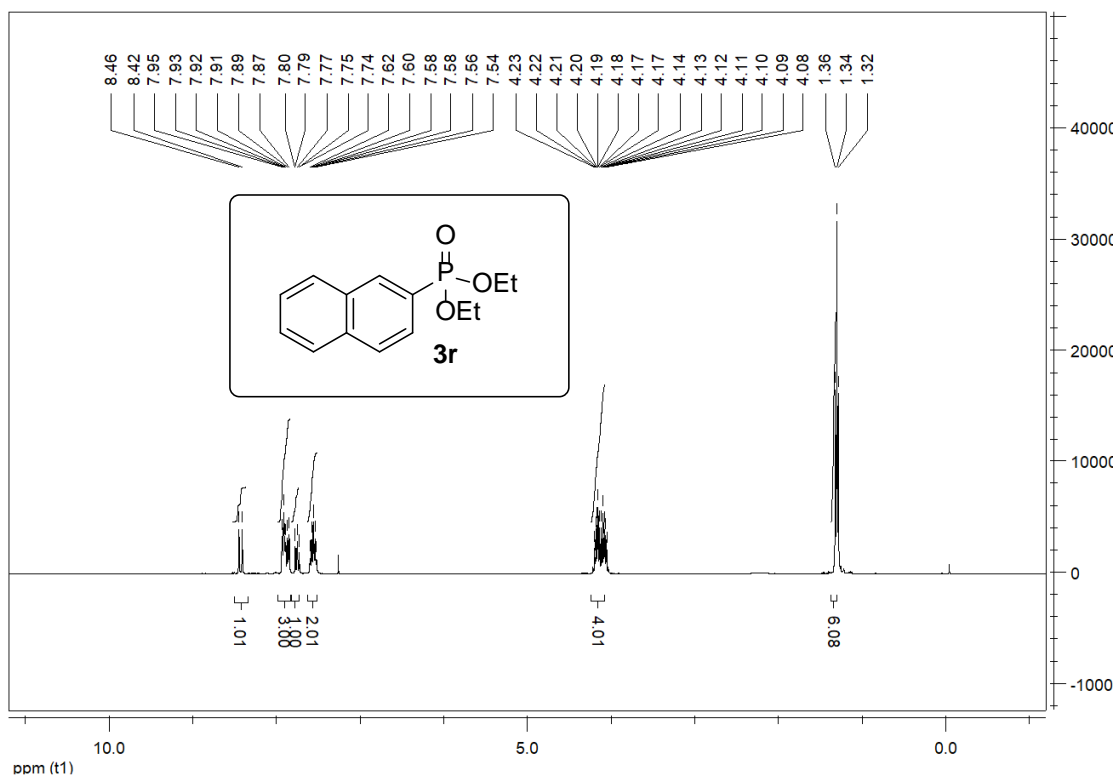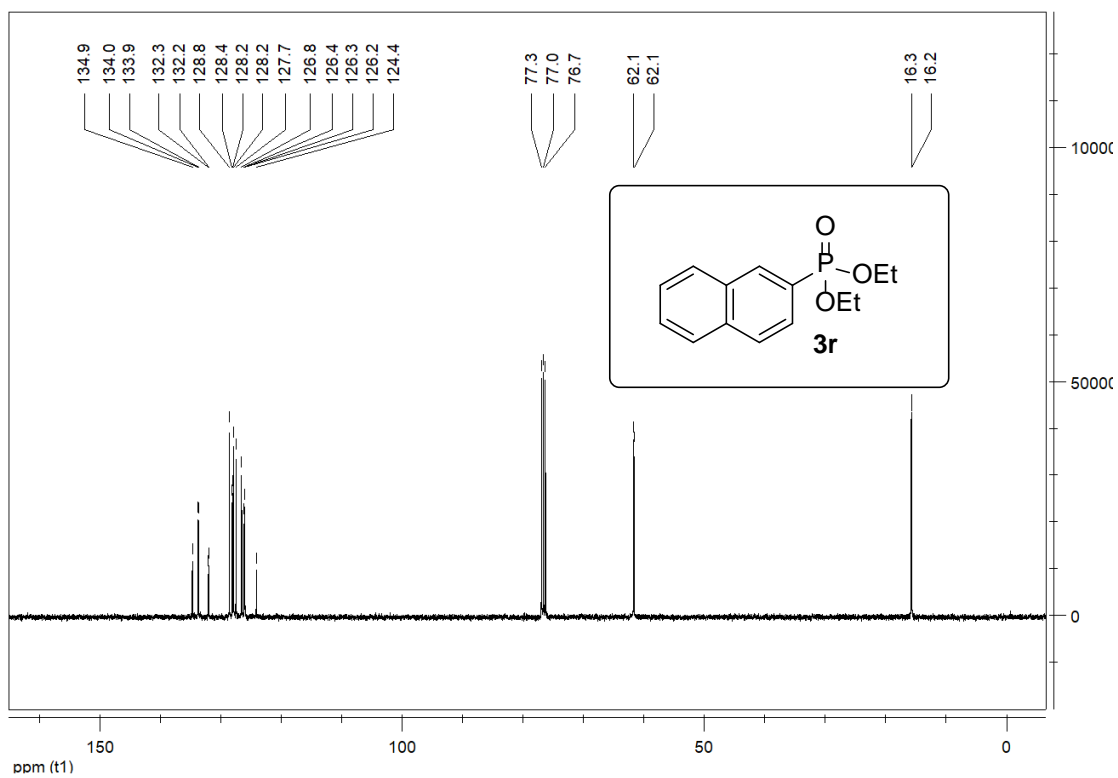

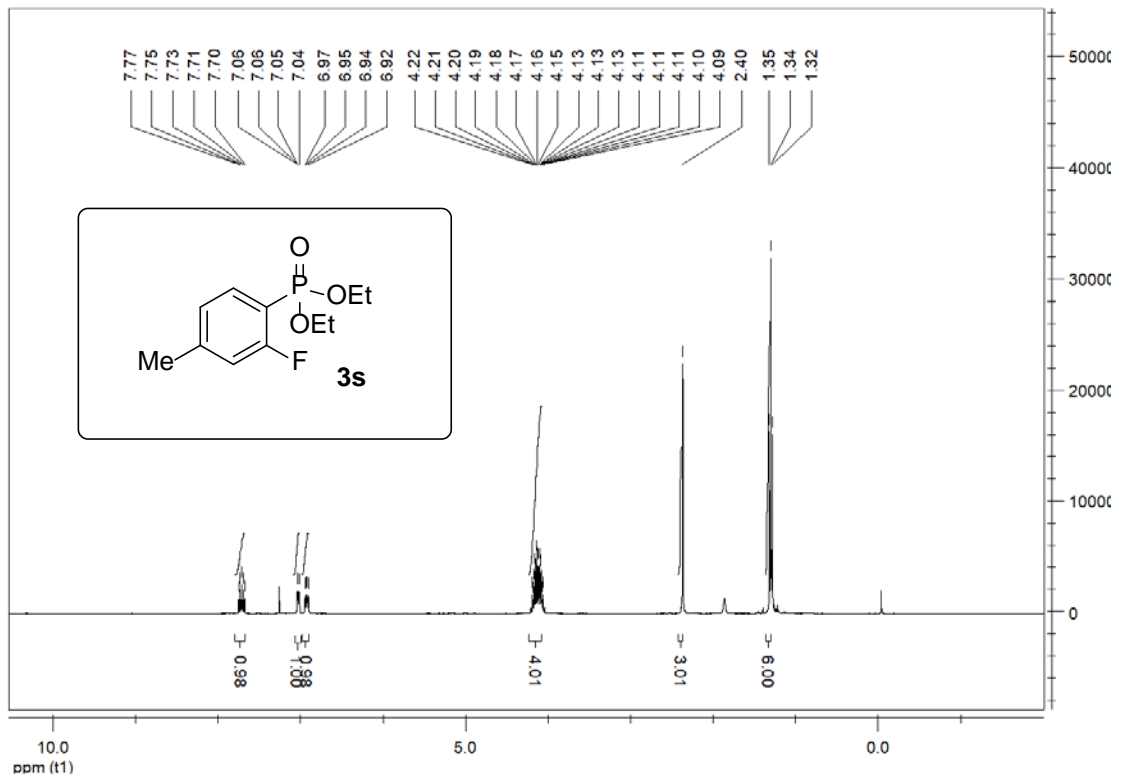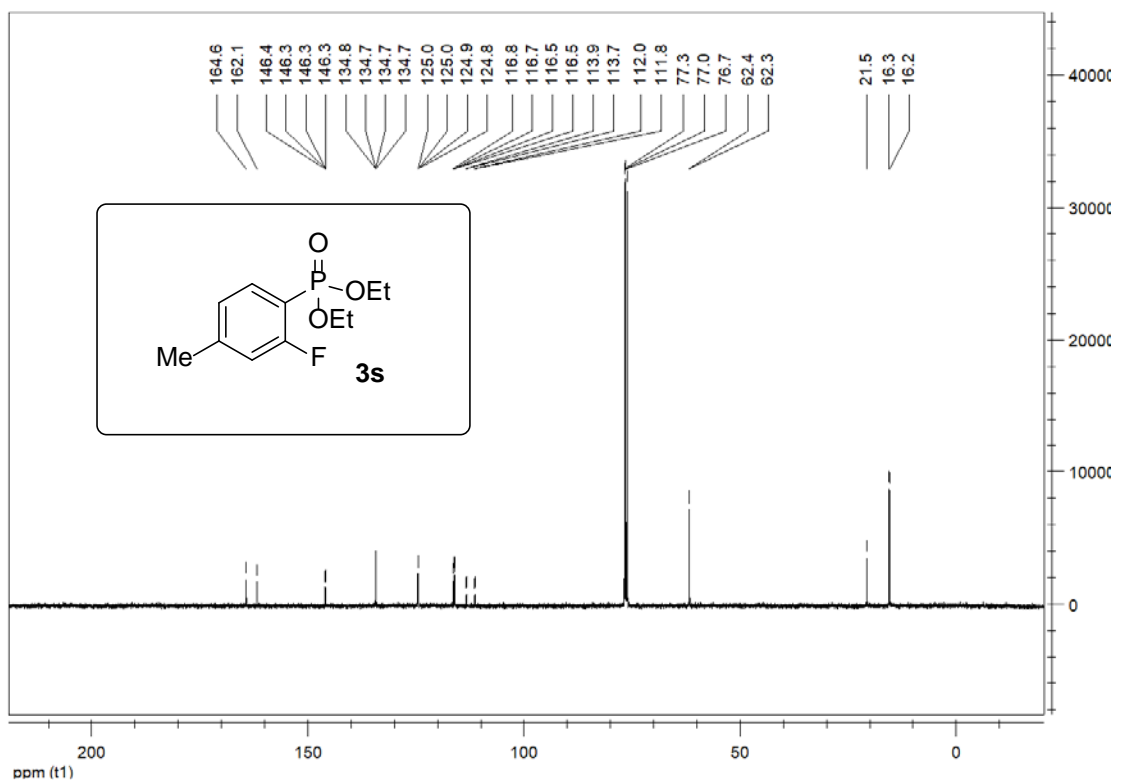

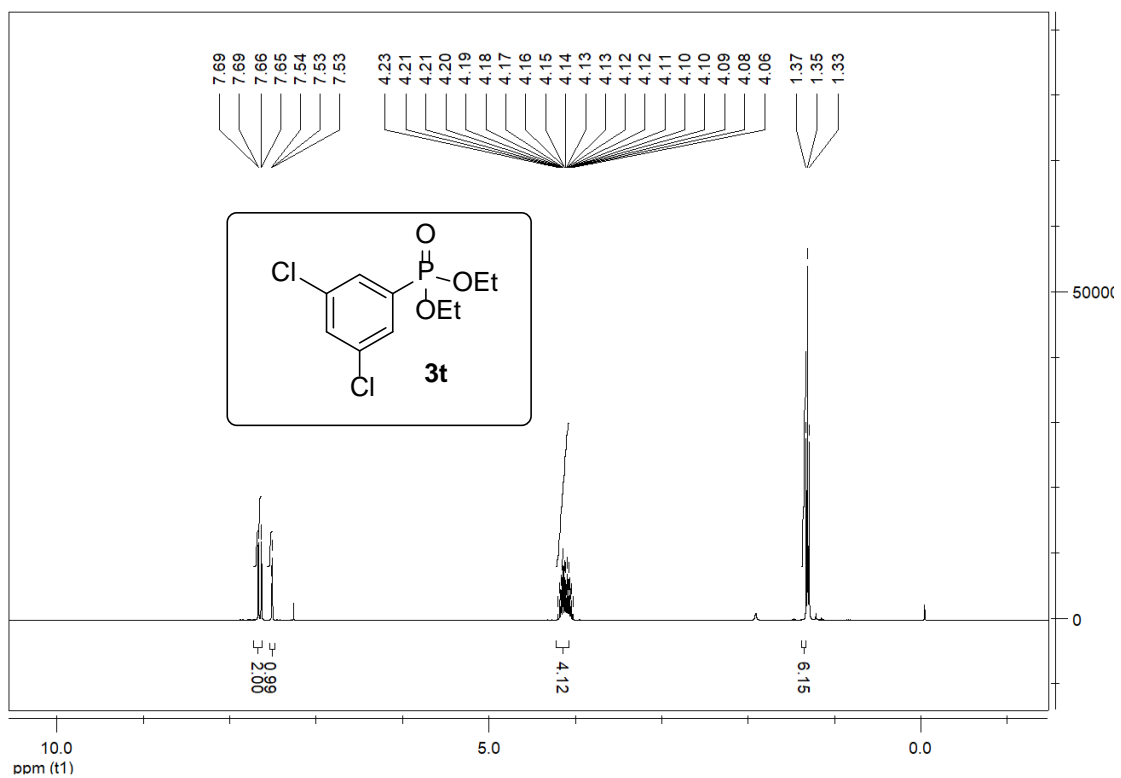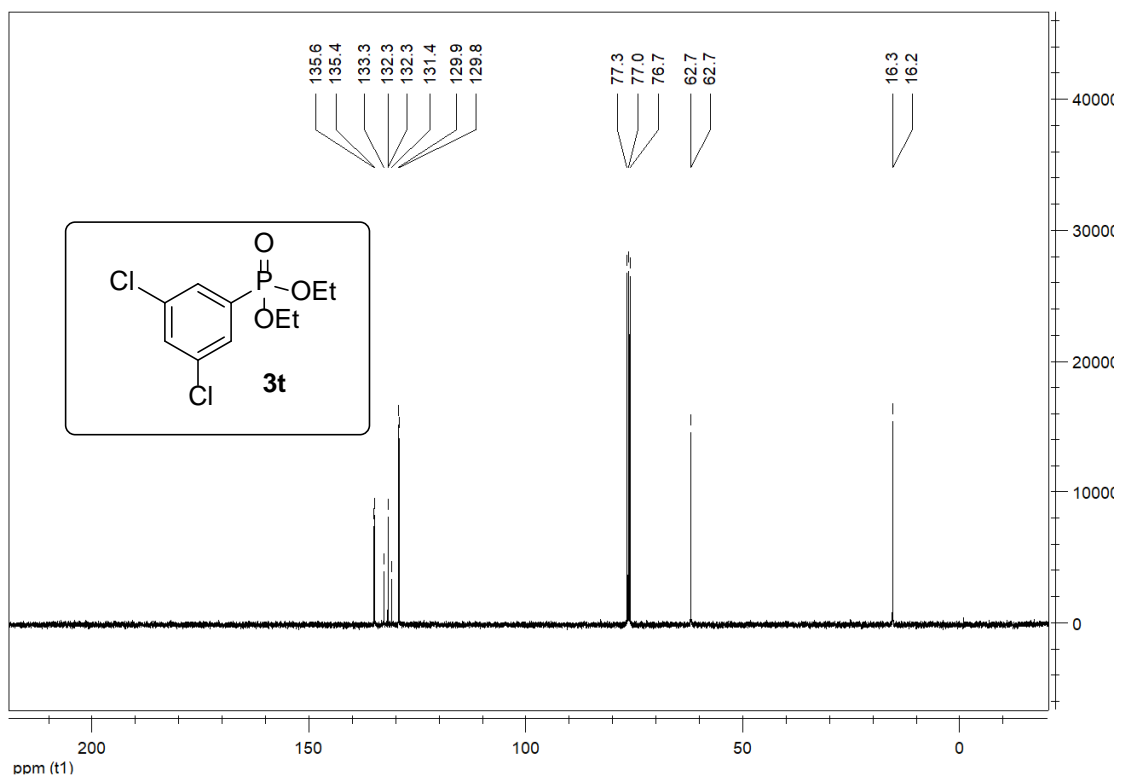

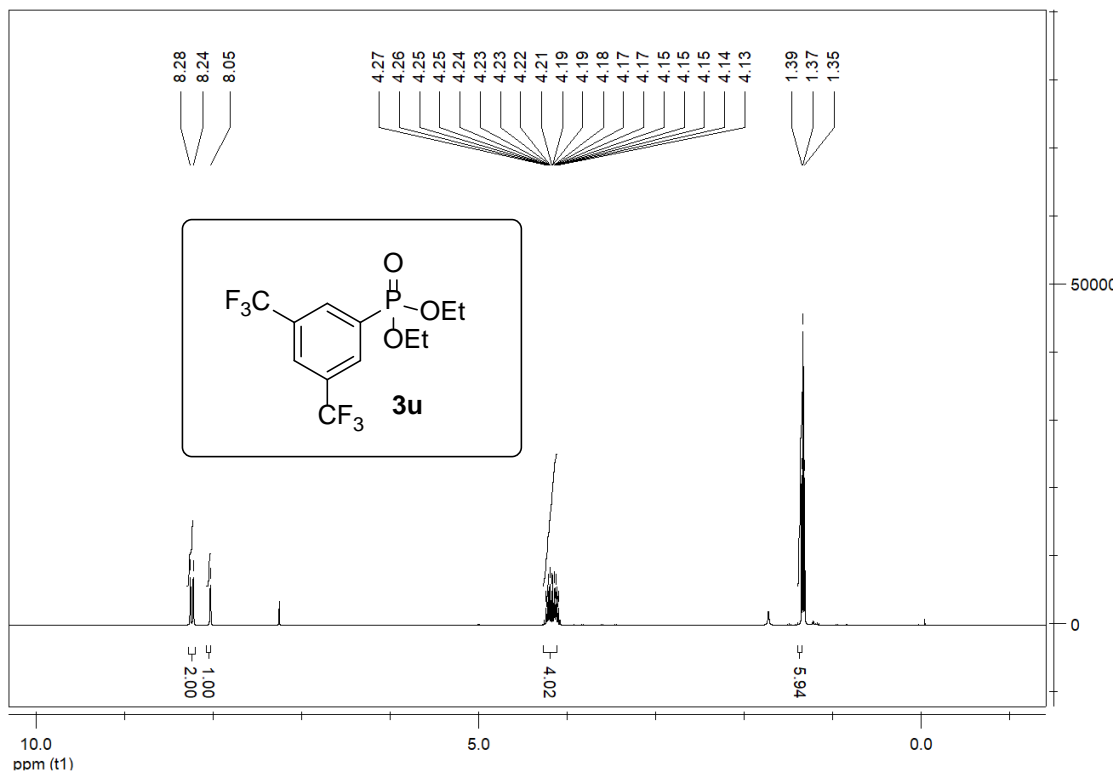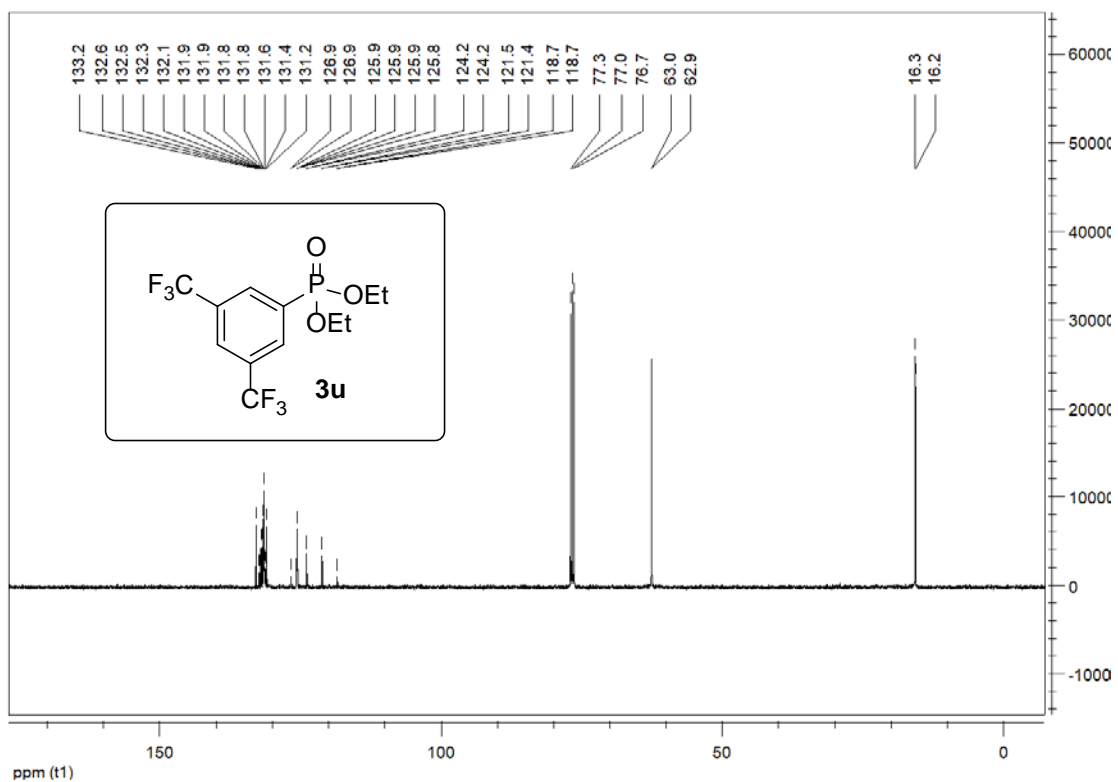



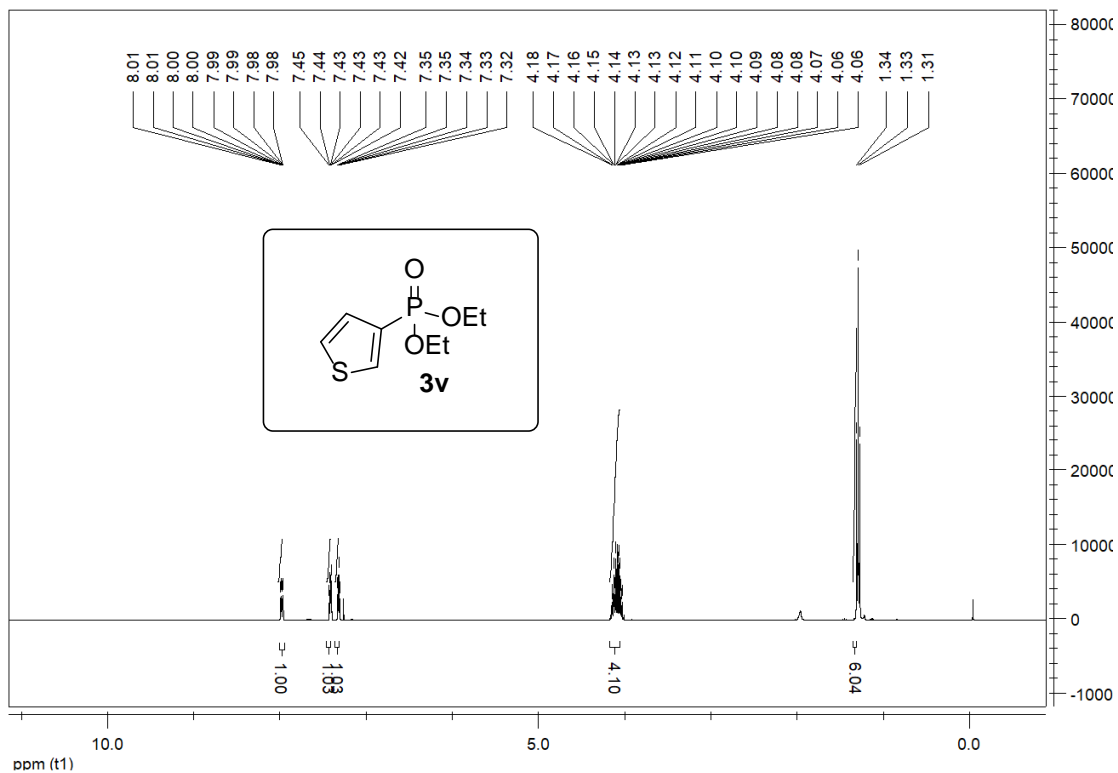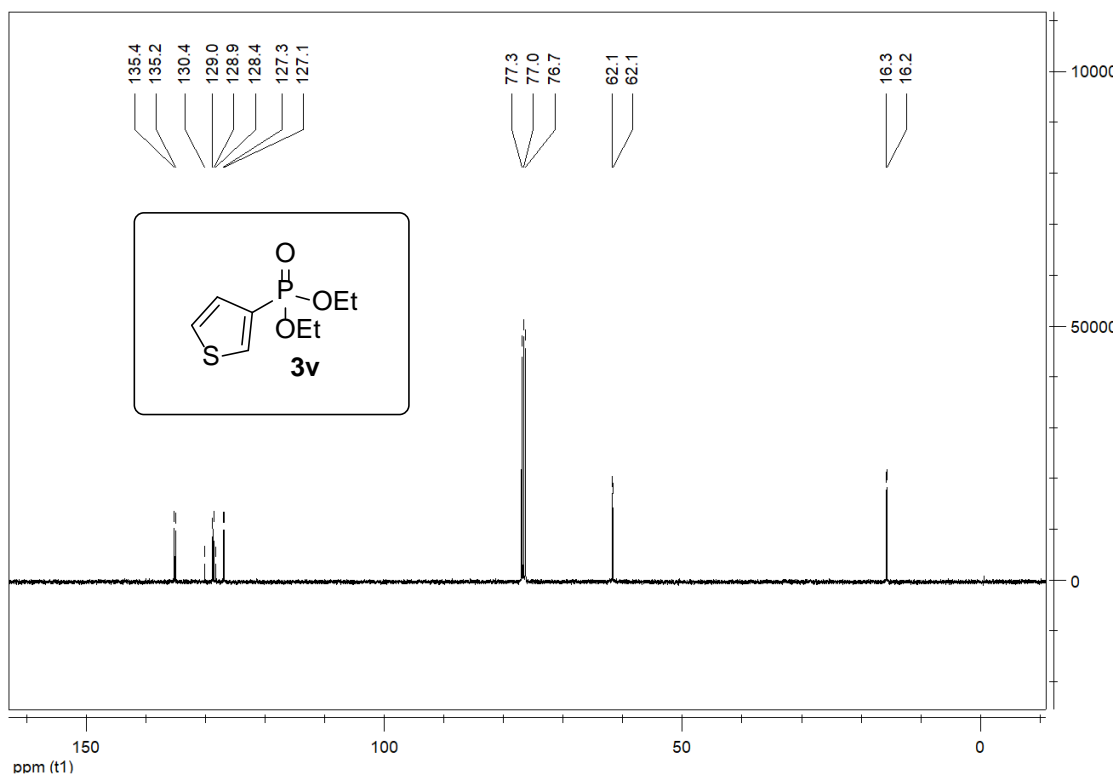

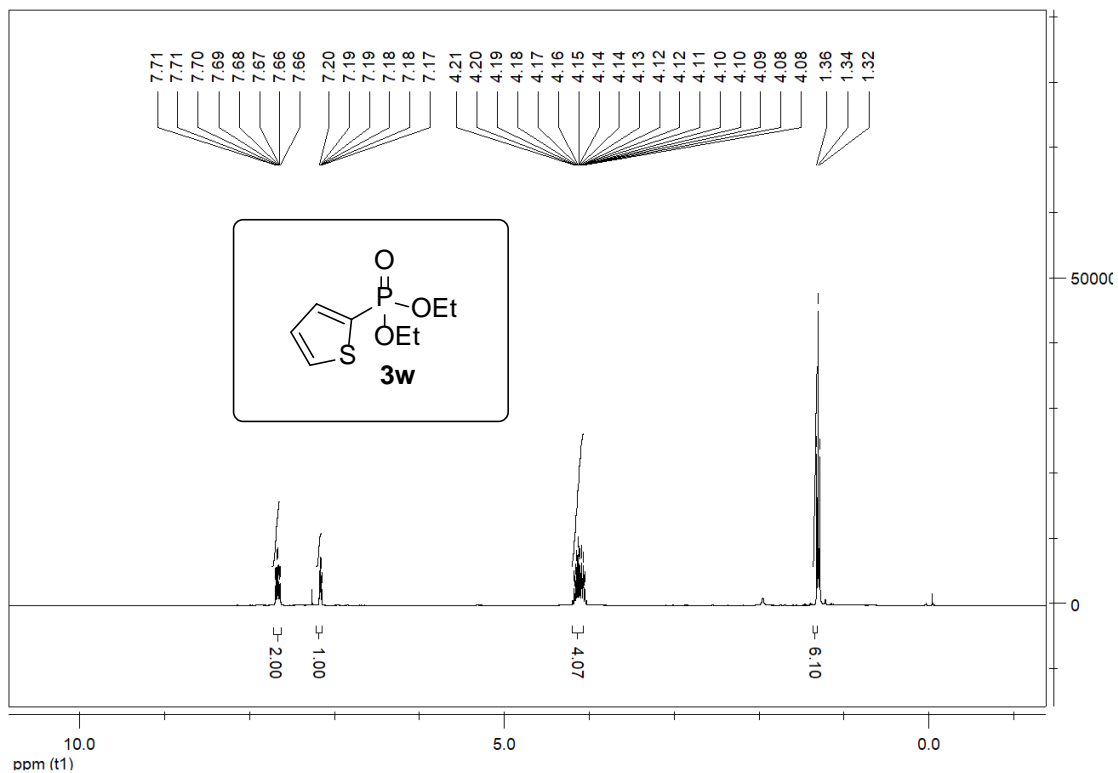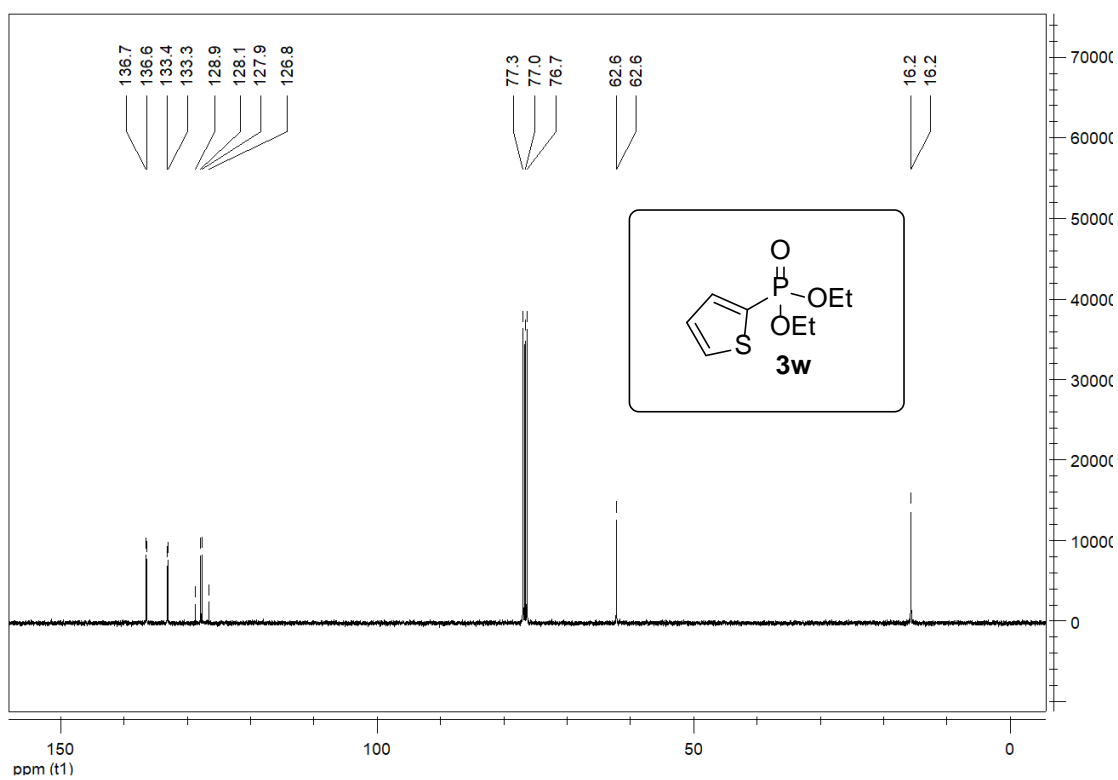

Supplement: c9cc07069a1.pdf [file c9cc07069a1.pdf]
